# Supplementary material for: Rapid phenotypic evolution in multidrug-resistant Klebsiella pneumoniae hospital outbreak strains
Source: PubMed Central journal article supplement (PMC6521586; doi:10.1099/mgen.0.000263), 2019-04-02
Supplement: mgen-5-263-s001.pdf [file mgen-5-263-s001.pdf]

# Supplementary Figures and Tables

## Rapid phenotypic evolution in multidrug resistant *Klebsiella pneumoniae* hospital outbreak strains

### Contents

|                                                                             |           |
|-----------------------------------------------------------------------------|-----------|
| <b>S1 Dataset collection, CRKP surveillance and intervention strategies</b> | <b>3</b>  |
| <b>S2 Inferring a timed phylogeny and transmission networks</b>             | <b>12</b> |
| S2.1 BEAST analyses . . . . .                                               | 12        |
| S2.2 TransPhylo analyses . . . . .                                          | 14        |
| <b>S3 Inferring core and accessory genome structure</b>                     | <b>17</b> |
| <b>S4 AMR gene copy number variation (CNV) and phenotypic resistance</b>    | <b>19</b> |
| <b>S5 Plasmid assemblies</b>                                                | <b>22</b> |
| S5.1 Plasmid copy number variation . . . . .                                | 23        |
| S5.2 Accessory genome mobility . . . . .                                    | 25        |
| S5.3 <i>bla</i> <sub>KPC</sub> mobility . . . . .                           | 26        |

### List of Figures

|     |                                                                                                                                   |    |
|-----|-----------------------------------------------------------------------------------------------------------------------------------|----|
| S1  | The hospital ward location map of all infected patients sampled during CRKP surveillance.                                         | 3  |
| S2  | Patient admission information, including movement through hospital wards and time points of sampling for CRKP and WGS. . . . .    | 10 |
| S3  | Core genome maximum likelihood phylogeny of 100 isolates sampled as part of the CRKP surveillance initiative. . . . .             | 11 |
| S4  | Temporal signal across 82 ST11 outbreak isolates. . . . .                                                                         | 12 |
| S5  | Posterior distribution around inferred tMRCA under 6 alternate BEAST models . . .                                                 | 13 |
| S6  | TransPhylo consensus transmission tree . . . . .                                                                                  | 14 |
| S7  | TransPhylo scale parameter sensitivity analysis . . . . .                                                                         | 15 |
| S8  | Core genome phylogeny of 82 ST11 outbreak isolates . . . . .                                                                      | 17 |
| S9  | Core and accessory gene tree . . . . .                                                                                            | 18 |
| S10 | Associations between aminoglycoside resistance genes and phenotypic resistance to the aminoglycoside antibiotic amikacin. . . . . | 19 |
| S11 | Associations between beta-lactam resistance genes and phenotypic resistance to beta-lactam antibiotics. . . . .                   | 20 |
| S12 | Associations between quinolone resistance genes and phenotypic resistance to quinolone antibiotics . . . . .                      | 21 |
| S13 | Relationship between AMR gene pseudo-TPMs and plasmid coverage. . . . .                                                           | 24 |
| S14 | Blast identity (%) between two plasmids assembled using long-read data from CX20 .                                                | 25 |
| S15 | Genomic background and <i>bla</i> <sub>KPC+</sub> TN1722 type transposon structure. . . . .                                       | 26 |

## List of Tables

|    |                                                                                           |    |
|----|-------------------------------------------------------------------------------------------|----|
| S1 | Description of full dataset . . . . .                                                     | 4  |
| S2 | Phenotypic resistance (MICs) for full dataset . . . . .                                   | 7  |
| S3 | Inferred tMRCA, clock rates and marginal likelihoods inferred by Bayesian dating analyses | 13 |
| S4 | TransPhylo inferred direct transmission pairings . . . . .                                | 16 |
| S5 | Presence of plasmid replicons across isolates . . . . .                                   | 18 |
| S6 | PacBio assembly statistics . . . . .                                                      | 22 |
| S7 | Presence of plasmid replicons across PacBio long-read assemblies . . . . .                | 22 |
| S8 | Copy number variation (CNV) amongst assembled plasmids . . . . .                          | 23 |
| S9 | Percentage of the genome covered amongst assembled plasmids . . . . .                     | 23 |

# S1 Dataset collection, CRKP surveillance and intervention strategies

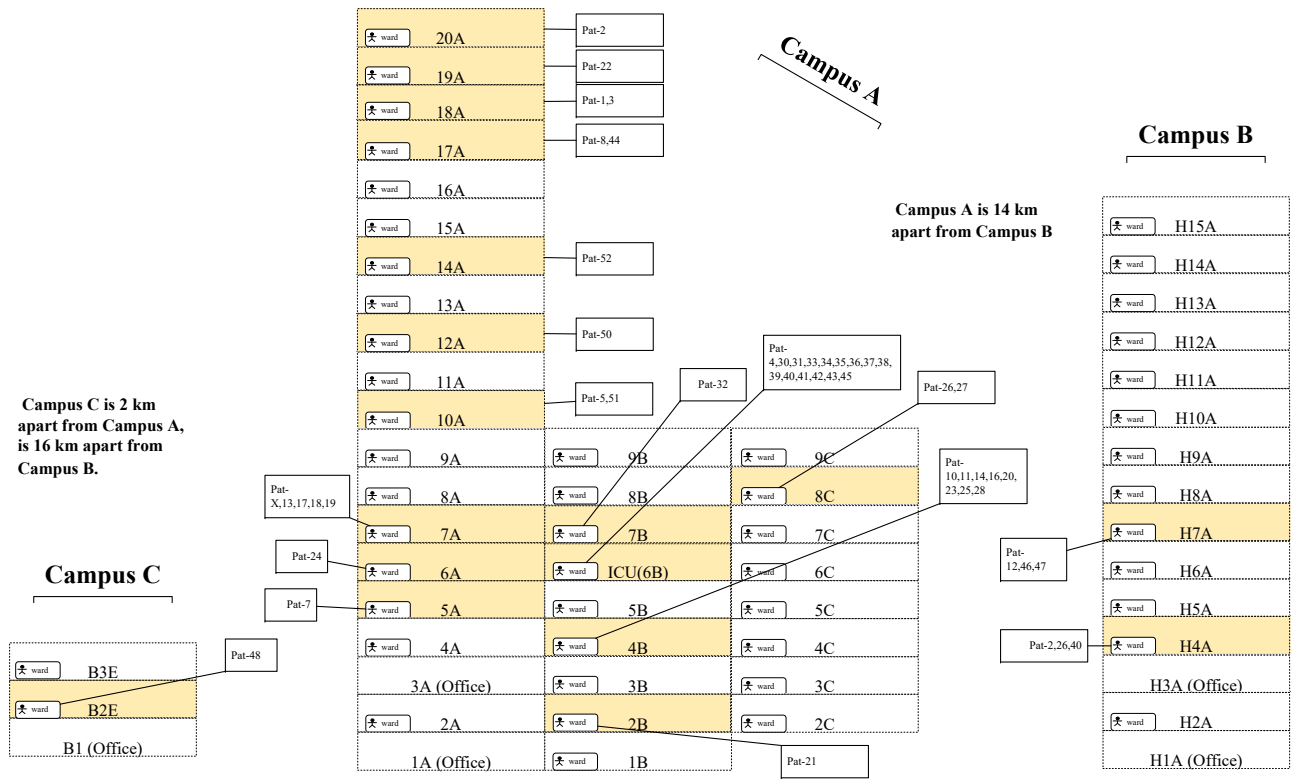

Figure S1: Schematic representation of the PKUPH hospital and ward locations across campuses A, B and C. Wards are coloured yellow to indicate where CRKP+ isolates were identified with labels providing the patients included in the final dataset. Full details of the final collection are provided in Table S1.

Table S1: The full meta-data for isolates collected from patients over the course of the CRKP surveillance period. Short read sequence IDs marked with a ‘\*’ were also sequenced using PacBio long read technology. The lineage assignments (Lin.) and MLST groupings are provided based on bioinformatic analyses.

| Patient             | ID    | Type          | MLST | Date       | Specimen          | Ward    | Category | Department       | Campus | Disease                    | Lin. | Outcome |
|---------------------|-------|---------------|------|------------|-------------------|---------|----------|------------------|--------|----------------------------|------|---------|
| 6                   | CX3   | infection     | 11   | 30/07/2015 | sputum            | H4A     | Common   | ICU              | B      | Acute Myeloid Leukemia-M4  | O    | Cured   |
| 5                   | CX94  | infection     | 307  | 23/10/2015 | sputum            | 10A     | Common   | Hematology       | A      | Acute Myeloid Leukemia     | O    | Cured   |
| 5                   | CX95  | infection     | 307  | 07/11/2015 | sputum            | 10A     | Common   | Hematology       | A      | Acute Myeloid Leukemia     | O    | Cured   |
| 5                   | CX96  | infection     | 307  | 14/11/2015 | sputum            | 10A     | Common   | Hematology       | A      | Acute Myeloid Leukemia     | O    | Cured   |
| 5                   | CX97  | infection     | 307  | 01/12/2015 | sputum            | 10A     | Common   | Hematology       | A      | Acute Myeloid Leukemia     | O    | Cured   |
| 13                  | CX8   | infection     | 11   | 04/01/2016 | peritoneal        | 7A      | Common   | Hepatobiliary    | A      | Obstructed Jaundice        | 1    | Abandon |
| 11                  | CX13  | infection     | 11   | 09/01/2016 | sputum            | ICU(4B) | ICU(4B)  | ICU              | A      | Liver cancer               | 1    | Abandon |
| 8                   | CX21  | infection     | 11   | 13/01/2016 | urine             | 17A     | Common   | Geriatrics       | A      | Coronary heart disease     | O    | Cured   |
| 10                  | CX7   | infection     | 11   | 15/01/2016 | peritoneal        | ICU(4B) | ICU(4B)  | ICU              | A      | Liver transplantation      | 1    | Cured   |
| X                   | CX91  | infection     | 11   | 14/02/2016 | liver abscess     | 7A      | Common   | Hepatobiliary    | A      | Gallbladder carcinoma      | O    | Die     |
| X                   | CX90* | infection     | 11   | 15/02/2016 | blood             | 7A      | Common   | Hepatobiliary    | A      | Gallbladder carcinoma      | O    | Die     |
| 7                   | CX98  | infection     | 11   | 18/02/2016 | sputum            | 5A      | Common   | Cardiology       | A      | Pulmonary infection        | 2    | Cured   |
| 30                  | CX76  | infection     | 11   | 20/02/2016 | catheter          | ICU(6B) | ICU(6B)  | ICU              | A      | Pulmonary infection        | 1    | Cured   |
| 2                   | CX4   | infection     | 11   | 21/02/2016 | sputum            | 20A     | Common   | Hematology       | A      | Acute Myeloid Leukemia-M5  | O    | Cured   |
| 14                  | CX6   | infection     | 11   | 27/02/2016 | blood             | ICU(4B) | ICU(4B)  | ICU              | A      | Liver cirrhosis            | 1    | Die     |
| 46                  | CX19  | infection     | 11   | 29/02/2016 | sputum            | H7A     | Common   | Comprehensive    | B      | Pulmonary infection        | 2    | Die     |
| 33                  | CX11  | infection     | 11   | 14/03/2016 | trachea secretion | ICU(6B) | ICU(6B)  | ICU              | A      | Pulmonary infection        | 2    | Die     |
| 21                  | CX22  | infection     | 11   | 16/03/2016 | cervicovaginal    | 2B      | Common   | Obstetrics       | A      | Gestation                  | 1    | Cured   |
| 34                  | CX10  | infection     | 11   | 24/03/2016 | urine             | ICU(6B) | ICU(6B)  | ICU              | A      | Cerebral hemorrhage        | 3    | Die     |
| 15                  | CX5   | infection     | 11   | 27/03/2016 | blood             | 7A      | Common   | Hepatobiliary    | A      | Liver transplantation      | 1    | Cured   |
| 12                  | CX17  | infection     | 11   | 29/03/2016 | sputum            | H7A     | Common   | Comprehensive    | B      | Pulmonary infection        | 1    | Cured   |
| 1                   | CX1   | infection     | 11   | 04/04/2016 | blood             | 18A     | Common   | Hematology       | A      | Acute Myeloid Leukemia-M4  | O    | Die     |
| 16                  | CX9   | infection     | 11   | 05/04/2016 | blood             | ICU(4B) | ICU(4B)  | ICU              | A      | Liver cancer               | 2    | Die     |
| 37                  | CX20* | infection     | 11   | 05/04/2016 | sputum            | ICU(6B) | ICU(6B)  | ICU              | A      | Respiratory failure        | O    | Cured   |
| 31                  | CX16* | infection     | 11   | 10/04/2016 | secretion         | ICU(6B) | ICU(6B)  | ICU              | A      | Respiratory failure        | 2    | Cured   |
| 3                   | CX2   | infection     | 11   | 11/04/2016 | blood             | 18A     | Common   | Hematology       | A      | Acute Lymphocytic Leukemia | 2    | Die     |
| 32                  | CX24  | infection     | 11   | 12/04/2016 | blood             | 7B      | Common   | Gastroenterology | A      | Liver cirrhosis            | 2    | Die     |
| 35                  | CX99  | infection     | 11   | 13/04/2016 | urine             | ICU(6B) | ICU(6B)  | ICU              | A      | Respiratory failure        | 1    | Die     |
| 36                  | CX15  | infection     | 11   | 15/04/2016 | blood             | ICU(6B) | ICU(6B)  | ICU              | A      | Acute Myeloid Leukemia-M5  | 2    | Die     |
| 29                  | CX14  | infection     | 11   | 16/04/2016 | urine             | H4A     | Common   | ICU              | B      | Cerebral infarction        | 2    | Abandon |
| 23                  | CX12  | infection     | 11   | 20/04/2016 | sputum            | ICU(4B) | ICU(4B)  | ICU              | A      | Multiple fracture          | 1    | Abandon |
| 38                  | CX31  | infection     | 11   | 25/04/2016 | sputum            | ICU(6B) | ICU(6B)  | ICU              | A      | Acute pancreatitis         | 2    | Die     |
| oximeter 34         | CX77* | environmental | 11   | 26/04/2016 | environmental     | ICU(6B) | ICU(6B)  | ICU              | A      | Cerebral hemorrhage        | 3    | Die     |
| bed rail 35         | CX82  | environmental | 11   | 26/04/2016 | environmental     | ICU(6B) | ICU(6B)  | ICU              | A      | Respiratory failure        | 1    | Die     |
| vacuum extractor 12 | CX84  | environmental | 11   | 26/04/2016 | environmental     | H7A     | Common   | Comprehensive    | B      | Pulmonary infection        | 1    | Cured   |
| bed table 29        | CX85  | environmental | 11   | 26/04/2016 | environmental     | H4A     | Common   | ICU              | B      | Cerebral infarction        | 2    | Abandon |
| respirator 34       | CX80  | environmental | 11   | 26/04/2016 | environmental     | ICU(6B) | ICU(6B)  | ICU              | A      | Cerebral hemorrhage        | 3    | Die     |
| right bed rail 34   | CX81  | environmental | 11   | 26/04/2016 | environmental     | ICU(6B) | ICU(6B)  | ICU              | A      | Cerebral hemorrhage        | 3    | Die     |
| vacuum extractor 34 | CX122 | environmental | 11   | 26/04/2016 | environmental     | ICU(6B) | ICU(6B)  | ICU              | A      | Cerebral hemorrhage        | 3    | Die     |

... continued on next page...

| Patient          | ID     | Type                  | MLST     | Date       | Specimen       | Ward    | Ward Category | Department       | Campus | Disease                      | Lin. | Outcome |
|------------------|--------|-----------------------|----------|------------|----------------|---------|---------------|------------------|--------|------------------------------|------|---------|
| urine bag 34     | CX78   | environmental         | 11       | 26/04/2016 | environmental  | ICU(6B) | ICU(6B)       | ICU              | A      | Cerebral hemorrhage          | 3    | Die     |
| left bed rail 34 | CX79   | environmental         | 11       | 26/04/2016 | environmental  | ICU(6B) | ICU(6B)       | ICU              | A      | Cerebral hemorrhage          | 3    | Die     |
| infusion pump 35 | CX83   | environmental         | 11       | 26/04/2016 | environmental  | ICU(6B) | ICU(6B)       | ICU              | A      | Respiratory failure          | 1    | Die     |
| bed table 12     | CX121  | environmental         | 11       | 26/04/2016 | environmental  | H7A     | Common        | Comprehensive    | B      | Pulmonary infection          | 1    | Cured   |
| 47               | CX28   | infection             | 11       | 28/04/2016 | peritoneal     | H7A     | Common        | Comprehensive    | B      | Gallbladder carcinoma        | 3    | Die     |
| 20               | CX30   | infection             | 11       | 02/05/2016 | sputum         | ICU(4B) | ICU(4B)       | ICU              | A      | Pulmonary infection          | 1    | Cured   |
| 41               | CX27   | infection             | 11       | 11/05/2016 | sputum         | ICU(6B) | ICU(6B)       | ICU              | A      | Respiratory failure          | 3    | Cured   |
| 40               | CX34   | infection             | 11       | 14/05/2016 | blood          | ICU(6B) | ICU(6B)       | ICU              | A      | Guillain-Barre syndrome      | 3    | Die     |
| 24               | CX29   | infection             | 1905     | 17/05/2016 | wound          | 6A      | Common        | Gastrointestinal | A      | Gastrointestinal hemorrhage  | O    | Cured   |
| 25               | CX75   | infection             | 11       | 18/05/2016 | sputum         | ICU(4B) | ICU(4B)       | ICU              | A      | Bladder cancer               | 3    | Die     |
| 53               | CX35   | +ve CRKP screen       | 11       | 23/05/2016 | urethral swabs | ICU(6B) | ICU(6B)       | ICU              | A      | Thrombocytopenic purpura     | 3    | Cured   |
| 19               | CX92   | infection             | 11       | 25/05/2016 | sputum         | 7A      | Common        | Hepatobiliary    | A      | Duodenal ulcer               | 2    | Abandon |
| 22               | CX33   | infection             | 11       | 28/05/2016 | sputum         | 19A     | Common        | Hepatobiliary    | A      | Bone Tumors                  | 2    | Die     |
| 39               | CX36   | infection             | 11       | 02/06/2016 | urine          | ICU(6B) | ICU(6B)       | ICU              | A      | Coronary heart disease       | 3    | Cured   |
| 54               | CX38   | +ve CRKP screen       | 307      | 09/06/2016 | throat         | ICU(6B) | ICU(6B)       | ICU              | A      | Guillain-Barre syndrome      | O    | Abandon |
| 4                | CX37   | infection             | 11       | 11/06/2016 | blood          | ICU(6B) | ICU(6B)       | ICU              | A      | Acute Lymphocytic Leukemia   | 2    | Die     |
| 26               | CX41*  | infection             | 11       | 12/06/2016 | sputum         | 8C      | Common        | Neurosurgery     | A      | Cerebral hemorrhage          | 1    | Cured   |
| 49               | CX26   | infection             | 11       | 15/06/2016 | axilla         | H4A     | Common        | ICU              | B      | Pulmonary infection          | 3    | Die     |
| 57               | CX47   | +ve CRKP screen       | 11       | 15/06/2016 | rectal swab    | ICU(4B) | ICU(4B)       | ICU              | A      | Cerebral hernia              | 2    | Cured   |
| 61               | CX57   | +ve CRKP screen       | 11       | 15/06/2016 | rectal swab    | ICU(4B) | ICU(4B)       | ICU              | A      | Cerebral hemorrhage          | 3    | Die     |
| 29               | CX101  | +ve screen & clinical | 11       | 15/06/2016 | rectal swab    | H4A     | Common        | ICU              | B      | Cerebral infarction          | 2    | Abandon |
| 29               | CX102  | +ve screen & clinical | 11       | 15/06/2016 | axilla         | H4A     | Common        | ICU              | B      | Cerebral infarction          | 1    | Abandon |
| 29               | CX103  | +ve screen & clinical | 11       | 15/06/2016 | nose           | H4A     | Common        | ICU              | B      | Cerebral infarction          | 2    | Abandon |
| 29               | CX104* | +ve screen & clinical | 11       | 15/06/2016 | throat         | H4A     | Common        | ICU              | B      | Cerebral infarction          | 2    | Abandon |
| 49               | CX107  | +ve screen & clinical | 11       | 15/06/2016 | axilla         | H4A     | Common        | ICU              | B      | Pulmonary infection          | 3    | Die     |
| 39               | CX111  | +ve screen & clinical | 11       | 15/06/2016 | rectal swab    | ICU(6B) | ICU(6B)       | ICU              | A      | Pulmonary infection          | 3    | Cured   |
| 39               | CX112  | +ve screen & clinical | 11       | 15/06/2016 | rectal swab    | ICU(6B) | ICU(6B)       | ICU              | A      | Coronary heart disease       | 3    | Cured   |
| 17               | CX42   | infection             | 11       | 16/06/2016 | urine          | 7A      | Common        | Hepatobiliary    | A      | Coronary heart disease       | 1    | Cured   |
| 26               | CX113  | +ve screen & clinical | 11       | 20/06/2016 | nose           | 8C      | Common        | Neurosurgery     | A      | Liver cancer                 | 1    | Cured   |
| 18               | CX44   | infection             | 11       | 21/06/2016 | rectal swab    | 7A      | Common        | Hepatobiliary    | A      | Cerebral hemorrhage          | 1    | Cured   |
| 59               | CX49   | +ve CRKP screen       | 11       | 21/06/2016 | rectal swab    | 7A      | Common        | Hepatobiliary    | A      | Gastrointestinal perforation | 1    | Cured   |
| 17               | CX114  | +ve screen & clinical | 11       | 21/06/2016 | rectal swab    | 7A      | Common        | Hepatobiliary    | A      | Obstructed Jaundice          | 1    | Cured   |
| 55               | CX45*  | +ve CRKP screen       | 11       | 23/06/2016 | rectal swab    | 7A      | Common        | Hepatobiliary    | A      | Liver cancer                 | 1    | Cured   |
| 18               | CX116  | +ve screen & clinical | 1129-2LV | 24/06/2016 | rectal swab    | 7A      | Common        | Hepatobiliary    | A      | Gastric carcinoma            | 3    | Cured   |
| 24               | CX109  | +ve screen & clinical | 161-1LV  | 27/06/2016 | rectal swab    | 6A      | Common        | Gastrointestinal | A      | Gastrointestinal perforation | O    | Cured   |
| 24               | CX110  | +ve screen & clinical | 161-1LV  | 27/06/2016 | throat         | 6A      | Common        | Gastrointestinal | A      | Gastrointestinal hemorrhage  | O    | Cured   |
| 48               | CX40   | infection             | 11       | 06/07/2016 | blood          | B2E     | Common        | Liver Disease    | C      | Gastrointestinal hemorrhage  | O    | Cured   |
| 58               | CX48   | +ve CRKP screen       | 11       | 08/07/2016 | rectal swab    | ICU(6B) | ICU(6B)       | ICU              | A      | Liver cirrhosis              | 2    | Abandon |
| 56               | CX46   | +ve CRKP screen       | 11       | 13/07/2016 | rectal swab    | ICU(4B) | ICU(4B)       | ICU              | A      | Cerebral infarction          | 1    | Cured   |
| 27               | CX43   | infection             | 11       | 18/07/2016 | urine          | 8C      | Common        | Neurosurgery     | A      | Femoral fracture             | 1    | Cured   |
| 60               | CX50   | +ve CRKP screen       | 11       | 27/07/2016 | rectal swab    | 8C      | Common        | Neurosurgery     | A      | Cerebral hemorrhage          | 2    | Die     |
| 27               | CX115  | +ve screen & clinical | 416-1LV  | 27/07/2016 | rectal swab    | 8C      | Common        | Neurosurgery     | A      | Subdural edema               | 2    | Abandon |
| 66               | CX66   | +ve CRKP screen       | 370      | 28/07/2016 | rectal swab    | ICU(6B) | ICU(6B)       | ICU              | A      | Cerebral hemorrhage          | O    | Die     |
| 65               | CX63   | +ve CRKP screen       | 11       | 29/07/2016 | rectal swab    | ICU(6B) | ICU(6B)       | ICU              | A      | Pulmonary infection          | O    | Cured   |
|                  |        |                       |          |            |                |         |               |                  | A      | Respiratory failure          | O    | Cured   |

... continued on next page...

| Patient | ID     | Type                  | MLST   | Date       | Specimen          | Ward    | Ward Category | Department   | Campus | Disease                        | Lin. | Outcome |
|---------|--------|-----------------------|--------|------------|-------------------|---------|---------------|--------------|--------|--------------------------------|------|---------|
| 64      | CX61   | +ve CRKP screen       | 26-1LV | 04/08/2016 | rectal swab       | ICU(4B) | ICU(4B)       | ICU          | A      | Pancreatic carcinoma           | O    | Cured   |
| 68      | CX70   | +ve CRKP screen       | 656    | 04/08/2016 | rectal swab       | ICU(4B) | ICU(4B)       | ICU          | A      | Breast Cancer                  | O    | Die     |
| 28      | CX51   | infection             | 11     | 11/08/2016 | sputum            | ICU(4B) | ICU(4B)       | ICU          | A      | Rectal carcinoma               | 3    | Die     |
| 62      | CX59   | +ve CRKP screen       | 11     | 15/08/2016 | rectal swab       | ICU(4B) | ICU(4B)       | ICU          | A      | Endometrial hyperplasia        | 3    | Cured   |
| 63      | CX60   | +ve CRKP screen       | 11     | 19/08/2016 | rectal swab       | ICU(4B) | ICU(4B)       | ICU          | A      | Ovarian carcinoma              | 3    | Die     |
| 69      | CX71   | +ve CRKP screen       | 11     | 21/08/2016 | rectal swab       | ICU(4B) | ICU(4B)       | ICU          | A      | Colon Cancer                   | 3    | Cured   |
| 67      | CX67   | +ve CRKP screen       | 15     | 23/08/2016 | rectal swab       | ICU(4B) | ICU(4B)       | ICU          | A      | Lung carcinoma                 | O    | Cured   |
| 52      | CX55   | infection             | 11     | 07/09/2016 | bone marrow       | 14A     | Common        | Rheumatology | A      | Fever of unknown origin        | 3    | Cured   |
| 42      | CX56   | infection             | 11     | 10/09/2016 | blood             | ICU(6B) | ICU(6B)       | ICU          | A      | Respiratory failure            | 3    | Die     |
| 43      | CX65   | infection             | 11     | 12/09/2016 | trachea secretion | ICU(6B) | ICU(6B)       | ICU          | A      | Invasive Fungal Disease        | 3    | Abandon |
| 70      | CX73   | +ve CRKP screen       | 182    | 23/09/2016 | rectal swab       | H15A    | Common        | Hematology   | B      | Acute Myeloid Leukemia-M5      | O    | Cured   |
| 50      | CX58   | infection             | 2535   | 24/09/2016 | urine             | 12A     | Common        | Orthopedics  | A      | Periprosthetic joint infection | O    | Cured   |
| 29      | CX105* | +ve screen & clinical | 11     | 16/10/2016 | axilla            | H4A     | Common        | ICU          | B      | Cerebral infarction            | 2    | Abandon |
| 29      | CX106  | +ve screen & clinical | 11     | 16/10/2016 | throat            | H4A     | Common        | ICU          | B      | Cerebral infarction            | 2    | Abandon |
| 51      | CX72   | infection             | 629    | 19/10/2016 | urine             | 10A     | Common        | Hematology   | A      | Acute Myeloid Leukemia         | O    | Cured   |
| 45      | CX68   | infection             | 11     | 22/10/2016 | blood             | ICU(6B) | ICU(6B)       | ICU          | A      | Liver transplantation          | 1    | Abandon |
| 44      | CX69   | infection             | 11     | 26/10/2016 | urine             | 17A     | Common        | Geriatrics   | A      | Viral hepatitis                | 3    | Cured   |

Table S2: The phenotypic resistance profiles, measured through MICs, for isolates collected over the course of the CRKP surveillance period. Entries marked 'ND' were not tested.

| ID    | meropenem | imipenem | polymyxin | tigecycline | cefoxitin | cefepime | ceftazidime | cefotaxime | ceftriaxone | cefperazone | piperacillin | amikacin | ciprofloxacin | levofloxacin | minocycline | fosfomycin |
|-------|-----------|----------|-----------|-------------|-----------|----------|-------------|------------|-------------|-------------|--------------|----------|---------------|--------------|-------------|------------|
| CX1   | >32       | 16       | 0.25      | 0.5         | 128       | 64       | 64          | >256       | 256         | >256        | >256         | >256     | >64           | 64           | 1           | >256       |
| CX10  | >32       | 16       | 0.25      | 0.5         | 128       | 64       | 32          | 256        | >256        | 256         | >256         | >256     | 64            | 32           | 1           | >256       |
| CX101 | >32       | 16       | 0.5       | 4           | >256      | 128      | 64          | 128        | 128         | >256        | >256         | >256     | >64           | >64          | 32          | >256       |
| CX102 | >32       | >32      | 0.5       | 4           | >256      | 256      | 256         | 256        | >256        | >256        | >256         | 1        | >64           | >64          | 64          | >256       |
| CX103 | >32       | 16       | 0.5       | 1           | 256       | 64       | 32          | 64         | 128         | 128         | 256          | 1        | 64            | 32           | 4           | >256       |
| CX104 | >32       | 16       | 0.5       | 1           | 256       | 64       | 64          | 128        | 256         | >256        | 256          | 1        | 64            | 32           | 32          | >256       |
| CX105 | >32       | 16       | 0.5       | 4           | >256      | 64       | 32          | 128        | 128         | >256        | >256         | >256     | >64           | >64          | 32          | >256       |
| CX106 | 0.25      | 0.125    | 0.5       | 4           | 256       | 16       | 2           | 32         | 64          | 64          | 16           | >256     | >64           | >64          | 8           | >256       |
| CX107 | >32       | 16       | 0.5       | 0.5         | 256       | 64       | 16          | 256        | >256        | 256         | >256         | >256     | 64            | 32           | 2           | >256       |
| CX109 | >32       | >32      | 0.5       | 1           | 128       | 128      | 64          | 256        | >256        | >256        | >256         | 1        | 32            | 16           | 4           | 256        |
| CX11  | >32       | >32      | 0.25      | 1           | >256      | 128      | 128         | 128        | 256         | >256        | >256         | >256     | 32            | 32           | 8           | >256       |
| CX110 | >32       | 32       | 0.5       | 1           | 128       | 128      | 64          | 256        | >256        | >256        | >256         | 1        | 32            | 16           | 4           | 256        |
| CX111 | >32       | 16       | 0.5       | 0.5         | 128       | 64       | 32          | >256       | >256        | >256        | >256         | >256     | 64            | 32           | 1           | >256       |
| CX112 | >32       | 16       | 0.5       | 0.5         | 128       | 64       | 32          | >256       | >256        | >256        | >256         | >256     | 64            | 32           | 1           | >256       |
| CX113 | >32       | 32       | 0.5       | 4           | 256       | 128      | 64          | 128        | 256         | >256        | >256         | 1        | >64           | >64          | 128         | >256       |
| CX114 | >32       | >32      | 0.5       | 4           | 256       | 64       | 32          | 128        | 256         | 256         | >256         | 2        | >64           | >64          | 128         | >256       |
| CX115 | 32        | 8        | 0.5       | 1           | 256       | 32       | 32          | 64         | 128         | >256        | >256         | >256     | 64            | 32           | 8           | >256       |
| CX116 | >32       | >32      | 0.5       | 4           | >256      | 128      | 128         | 256        | >256        | >256        | >256         | 1        | >64           | >64          | 64          | >256       |
| CX12  | >32       | >32      | 0.125     | 2           | 256       | 128      | 32          | 128        | 256         | 256         | >256         | >1024    | >64           | >64          | 128         | ND         |
| CX121 | >32       | >32      | 0.5       | 2           | 256       | 64       | 64          | 128        | 256         | 256         | >256         | 2        | 64            | 16           | 2           | >256       |
| CX122 | >32       | 16       | 0.5       | 0.25        | 256       | 64       | 32          | >256       | >256        | >256        | >256         | >256     | 64            | 32           | 1           | >256       |
| CX13  | >32       | >32      | 0.25      | 4           | 256       | 64       | 32          | 128        | 256         | 256         | >256         | 2        | >64           | >64          | 64          | >256       |
| CX14  | >32       | 16       | 0.5       | 4           | 256       | 64       | 32          | 128        | 256         | >256        | >256         | >256     | >64           | >64          | 32          | >256       |
| CX15  | >32       | 16       | 0.5       | 1           | 256       | 64       | 32          | 128        | 256         | >256        | >256         | >256     | 32            | 32           | 8           | >256       |
| CX16  | >32       | 16       | 32        | 2           | 128       | 64       | 32          | 128        | 256         | >256        | >256         | >256     | >64           | >64          | 16          | >256       |
| CX17  | >32       | 32       | 0.25      | 0.5         | 128       | 64       | 128         | 128        | 256         | >256        | >256         | 2        | 32            | 16           | 1           | >256       |
| CX19  | >32       | 8        | 0.25      | 1           | 256       | 64       | 32          | 128        | 256         | >256        | >256         | >256     | 32            | 32           | 8           | >256       |
| CX2   | >32       | 16       | 0.125     | 1           | 256       | 128      | 64          | 128        | 256         | >256        | >256         | >256     | 32            | 32           | 32          | >256       |
| CX20  | >32       | 16       | 0.25      | 2           | 128       | 64       | 128         | 256        | >256        | 256         | >256         | 1        | 32            | 32           | 4           | >256       |
| CX21  | 16        | 4        | 0.25      | 0.5         | 128       | 64       | >256        | 256        | >256        | 256         | 256          | >256     | 32            | 16           | 4           | 256        |
| CX22  | >32       | >32      | 0.25      | 4           | >256      | 128      | 64          | >256       | >256        | >256        | >256         | 1        | >64           | 64           | 128         | >256       |
| CX24  | 32        | 8        | 0.25      | 1           | 256       | 64       | 32          | 64         | 128         | >256        | >256         | >256     | 32            | 32           | 8           | >256       |
| CX26  | 32        | 8        | 0.25      | 0.5         | 256       | 64       | 32          | 256        | >256        | 256         | >256         | >256     | 64            | 32           | 2           | 256        |
| CX27  | >32       | >32      | 0.25      | 0.25        | 128       | 64       | 32          | >256       | >256        | 256         | >256         | >1024    | 64            | 32           | 2           | ND         |
| CX28  | 32        | 8        | 0.25      | 0.5         | 128       | 32       | 256         | 128        | 128         | 256         | >256         | >256     | >64           | 32           | 4           | >256       |
| CX29  | 2         | 4        | 0.25      | 2           | 16        | 16       | 64          | 32         | 128         | 128         | >256         | 0.5      | 32            | 16           | 8           | 16         |
| CX3   | 4         | 32       | 0.25      | 2           | >256      | 32       | 64          | 64         | 16          | 16          | >256         | 32       | >64           | >64          | 16          | 256        |
| CX30  | >32       | >32      | 0.125     | 2           | 256       | 64       | 32          | 128        | 256         | 256         | >256         | 1        | >64           | >64          | 128         | ND         |
| CX31  | >32       | >32      | 0.25      | 0.5         | >256      | 64       | 32          | 128        | 128         | >256        | >256         | >1024    | 64            | 32           | 8           | ND         |
| CX33  | >32       | >32      | 0.25      | 0.5         | 256       | 64       | 32          | 128        | 256         | >256        | >256         | >1024    | 64            | 32           | 8           | ND         |
| CX34  | >32       | >32      | 0.25      | 0.25        | 256       | 64       | 32          | 256        | >256        | 128         | >256         | >1024    | >64           | 32           | 2           | ND         |
| CX35  | >32       | 16       | 0.25      | 0.5         | 256       | 64       | 32          | 256        | >256        | 256         | >256         | >256     | 64            | 32           | 2           | 256        |

... continued on next page...

| ID   | meropenem | imipenem | polymyxin | tigecycline | cefoxitin | cefepime | ceftazidime | cefotaxime | ceftriaxone | cefepazone | piperacillin | amikacin | ciprofloxacin | levofloxacin | minocycline | fosfomycin |
|------|-----------|----------|-----------|-------------|-----------|----------|-------------|------------|-------------|------------|--------------|----------|---------------|--------------|-------------|------------|
| CX36 | 32        | 32       | 0.25      | 0.125       | 128       | 64       | 32          | 256        | >256        | 128        | >256         | 0.5      | >64           | 32           | 2           | ND         |
| CX37 | 32        | 32       | 0.125     | 1           | 128       | 32       | 16          | 128        | 128         | 128        | 256          | >1024    | >64           | 64           | 16          | ND         |
| CX38 | 16        | 1        | 0.25      | 0.5         | 4         | 4        | 32          | 64         | 64          | 8          | 8            | 4        | >64           | 16           | 4           | 16         |
| CX4  | >32       | 16       | 0.25      | 2           | 256       | 128      | 256         | 256        | 256         | 256        | >256         | 1        | 64            | 64           | 8           | >256       |
| CX40 | 32        | 32       | 0.25      | 0.5         | 256       | 64       | 64          | 128        | 128         | >256       | >256         | >1024    | 64            | 32           | 8           | ND         |
| CX41 | >32       | >32      | 0.125     | 4           | 256       | 128      | 64          | 128        | >256        | >256       | >256         | 2        | >64           | >64          | 128         | ND         |
| CX42 | >32       | >32      | 0.125     | 2           | 256       | 64       | 32          | 128        | 256         | 256        | >256         | 2        | >64           | >64          | 128         | ND         |
| CX43 | 32        | 4        | 0.25      | 0.5         | 256       | 64       | 32          | 128        | 128         | >256       | >256         | >1024    | 64            | 32           | 8           | ND         |
| CX44 | >32       | >32      | 0.125     | 4           | 256       | 128      | 32          | 128        | 256         | 256        | >256         | 2        | >64           | >64          | 64          | ND         |
| CX45 | >32       | 8        | 0.5       | 1           | 128       | 64       | 32          | 256        | >256        | 256        | >256         | >256     | 64            | 32           | 2           | >256       |
| CX46 | >32       | >32      | 0.5       | 4           | 128       | 64       | 64          | >256       | 256         | >256       | >256         | 1        | >64           | >64          | 64          | >256       |
| CX47 | >32       | 16       | 0.5       | 1           | >256      | 64       | 64          | 128        | 256         | >256       | >256         | >256     | 64            | 32           | 8           | >256       |
| CX48 | 8         | 8        | 0.5       | 2           | 64        | 256      | >256        | >256       | >256        | 256        | >256         | 4        | >64           | 64           | 32          | >256       |
| CX49 | >32       | >32      | 0.5       | 4           | 256       | 64       | 32          | 128        | 256         | 256        | >256         | 2        | >64           | >64          | 64          | >256       |
| CX5  | >32       | 32       | 0.25      | 4           | >256      | 64       | 64          | 128        | 256         | >256       | >256         | 1        | >64           | 32           | 128         | >256       |
| CX50 | >32       | >32      | 0.5       | 1           | >256      | 256      | 256         | 256        | >256        | >256       | >256         | >256     | 64            | 32           | 8           | >256       |
| CX51 | 32        | 32       | 0.125     | 0.125       | 256       | 64       | 32          | 256        | >256        | 256        | >256         | >1024    | >64           | 32           | 2           | ND         |
| CX55 | 32        | 32       | 0.125     | 0.25        | 128       | 64       | 64          | 256        | >256        | 256        | >256         | >1024    | >64           | 32           | 2           | ND         |
| CX56 | 32        | 32       | 0.125     | 0.5         | 128       | 128      | 64          | >256       | >256        | >256       | >256         | >1024    | >64           | 32           | 8           | ND         |
| CX57 | >32       | 16       | 0.5       | 2           | 128       | 64       | 32          | >256       | >256        | >256       | >256         | >256     | 64            | 32           | 4           | >256       |
| CX58 | 16        | 16       | 0.25      | 2           | >256      | 64       | >256        | 256        | >256        | >256       | >256         | 0.5      | 4             | 8            | 32          | 256        |
| CX59 | >32       | 32       | 0.5       | 2           | 128       | 128      | 64          | >256       | >256        | >256       | >256         | >256     | 64            | 32           | 4           | >256       |
| CX6  | >32       | >32      | 0.25      | 0.5         | >256      | 256      | >256        | >256       | >256        | >256       | >256         | >256     | 32            | 32           | 2           | >256       |
| CX60 | >32       | 32       | 0.5       | 0.5         | 256       | 128      | 64          | >256       | >256        | >256       | >256         | >256     | 64            | 32           | 2           | >256       |
| CX61 | 8         | 4        | >32       | 4           | >256      | 64       | >256        | >256       | >256        | >256       | >256         | 128      | 1             | 1            | 2           | 256        |
| CX63 | >32       | >32      | 0.5       | 1           | 256       | 128      | 64          | 256        | >256        | >256       | >256         | >256     | >64           | 64           | 32          | >256       |
| CX65 | >32       | >32      | 0.25      | 1           | 128       | 64       | 32          | >256       | >256        | 256        | >256         | >1024    | >64           | 32           | 4           | ND         |
| CX66 | 2         | 1        | 0.5       | 1           | 128       | >256     | 32          | >256       | >256        | >256       | >256         | 2        | 4             | 1            | 4           | >256       |
| CX67 | 2         | 1        | 0.5       | 16          | 128       | 256      | 128         | >256       | >256        | 256        | >256         | 2        | >64           | 32           | 128         | 256        |
| CX68 | >32       | >32      | 0.25      | 1           | 256       | >256     | 256         | >256       | >256        | >256       | >256         | 8        | 32            | 16           | 4           | 256        |
| CX69 | >32       | 32       | 0.25      | 2           | 128       | 128      | 64          | >256       | >256        | >256       | >256         | >256     | 64            | 32           | 4           | >256       |
| CX7  | >32       | >32      | 0.125     | 8           | >256      | 128      | 128         | 256        | >256        | >256       | >256         | >256     | >64           | >64          | 64          | >256       |
| CX70 | 2         | 1        | 0.5       | 4           | 128       | 128      | >256        | >256       | >256        | 64         | 256          | 2        | >64           | >64          | 32          | >256       |
| CX71 | >32       | 32       | 0.5       | 2           | 256       | 64       | 64          | 256        | >256        | >256       | >256         | >256     | 64            | 32           | 4           | >256       |
| CX72 | 4         | 1        | 0.5       | 2           | 128       | >256     | 256         | >256       | >256        | 64         | >256         | 1        | >64           | >64          | 32          | 128        |
| CX73 | 8         | 16       | 0.5       | 2           | >256      | 32       | >256        | 256        | >256        | >256       | >256         | 1        | 1             | 1            | 8           | 64         |
| CX75 | 32        | 32       | 0.25      | 0.125       | 256       | 64       | 32          | >256       | >256        | 256        | >256         | >1024    | >64           | 32           | 2           | ND         |
| CX76 | >32       | 16       | 0.25      | 1           | 256       | 64       | 256         | 128        | 256         | 256        | >256         | >256     | 32            | 32           | 4           | >256       |
| CX77 | >32       | 16       | 0.5       | 0.5         | 256       | 64       | 32          | 256        | >256        | 256        | >256         | >256     | 64            | 32           | 1           | >256       |
| CX78 | >32       | 16       | 0.5       | 0.5         | 128       | 64       | 32          | >256       | >256        | >256       | >256         | >256     | >64           | 321          | 1           | >256       |
| CX79 | >32       | 8        | 0.5       | 2           | 256       | 128      | 32          | >256       | >256        | >256       | >256         | >256     | >64           | 32           | 2           | >256       |
| CX8  | >32       | 32       | 0.25      | 4           | 256       | 64       | 32          | 256        | 256         | 256        | >256         | 1        | >64           | 64           | 64          | >256       |
| CX80 | >32       | 16       | 0.5       | 0.25        | 128       | 64       | 64          | >256       | >256        | >256       | >256         | >256     | 64            | 32           | 1           | >256       |
| CX81 | >32       | 16       | 0.5       | 0.25        | 128       | 64       | 32          | 256        | >256        | >256       | >256         | >256     | 64            | 32           | 1           | >256       |

... continued on next page...



| ID   | meropenem | imipenem | polymyxin | tigecycline | cefoxitin | cefepime | ceftazidime | cefotaxime | ceftriaxone | cefperazone | piperacillin | amikacin | ciprofloxacin | levofloxacin | minocycline | fosfomycin |
|------|-----------|----------|-----------|-------------|-----------|----------|-------------|------------|-------------|-------------|--------------|----------|---------------|--------------|-------------|------------|
| CX82 | >32       | >32      | 0.5       | 4           | 256       | 64       | 32          | 128        | 256         | 256         | >256         | 1        | >64           | >64          | 64          | >256       |
| CX83 | >32       | >32      | 0.5       | 4           | >256      | 256      | 128         | 256        | >256        | >256        | >256         | 2        | >64           | >64          | 64          | >256       |
| CX84 | >32       | >32      | 0.5       | 0.5         | 256       | 64       | 32          | 128        | 256         | 256         | >256         | 2        | 32            | 16           | 1           | >256       |
| CX85 | >32       | 32       | 0.5       | 4           | 256       | 64       | 64          | 64         | 128         | >256        | >256         | >256     | >64           | >64          | 32          | >256       |
| CX9  | >32       | >32      | 0.25      | 0.5         | >256      | 64       | 32          | 128        | 128         | >256        | >256         | >1024    | 64            | 32           | 8           | ND         |
| CX90 | >32       | 32       | 0.25      | 1           | 256       | 128      | 256         | 256        | >256        | >256        | >256         | >256     | >64           | 64           | 16          | >256       |
| CX91 | >32       | 16       | 0.25      | 1           | 256       | 128      | 256         | 256        | >256        | >256        | >256         | >256     | >64           | 32           | 8           | >256       |
| CX92 | 16        | 8        | 0.125     | 0.5         | 256       | 64       | 32          | 64         | 128         | >256        | >256         | >1024    | 64            | 32           | 8           | ND         |
| CX94 | 4         | 4        | 0.25      | 8           | >256      | 64       | 32          | 256        | 128         | 64          | 64           | 16       | >64           | >64          | 128         | >256       |
| CX95 | 1         | 8        | 0.5       | 8           | >256      | 32       | 16          | 256        | 128         | 64          | 256          | 32       | >64           | >64          | 128         | >256       |
| CX96 | 0.125     | 0.125    | 0.5       | 8           | 64        | 64       | 256         | 256        | >256        | 64          | >256         | 4        | >64           | >64          | 128         | >256       |
| CX97 | 1         | 4        | 0.5       | 8           | >256      | 32       | 16          | 256        | 128         | 64          | 256          | 32       | >64           | >64          | 128         | >256       |
| CX98 | >32       | 8        | 0.25      | 2           | 256       | 64       | >256        | 128        | 256         | >256        | >256         | >256     | 32            | 32           | 4           | >256       |
| CX99 | >32       | >32      | 0.25      | 4           | 256       | 64       | 32          | 128        | 256         | 256         | >256         | 2        | >64           | >64          | 64          | 128        |



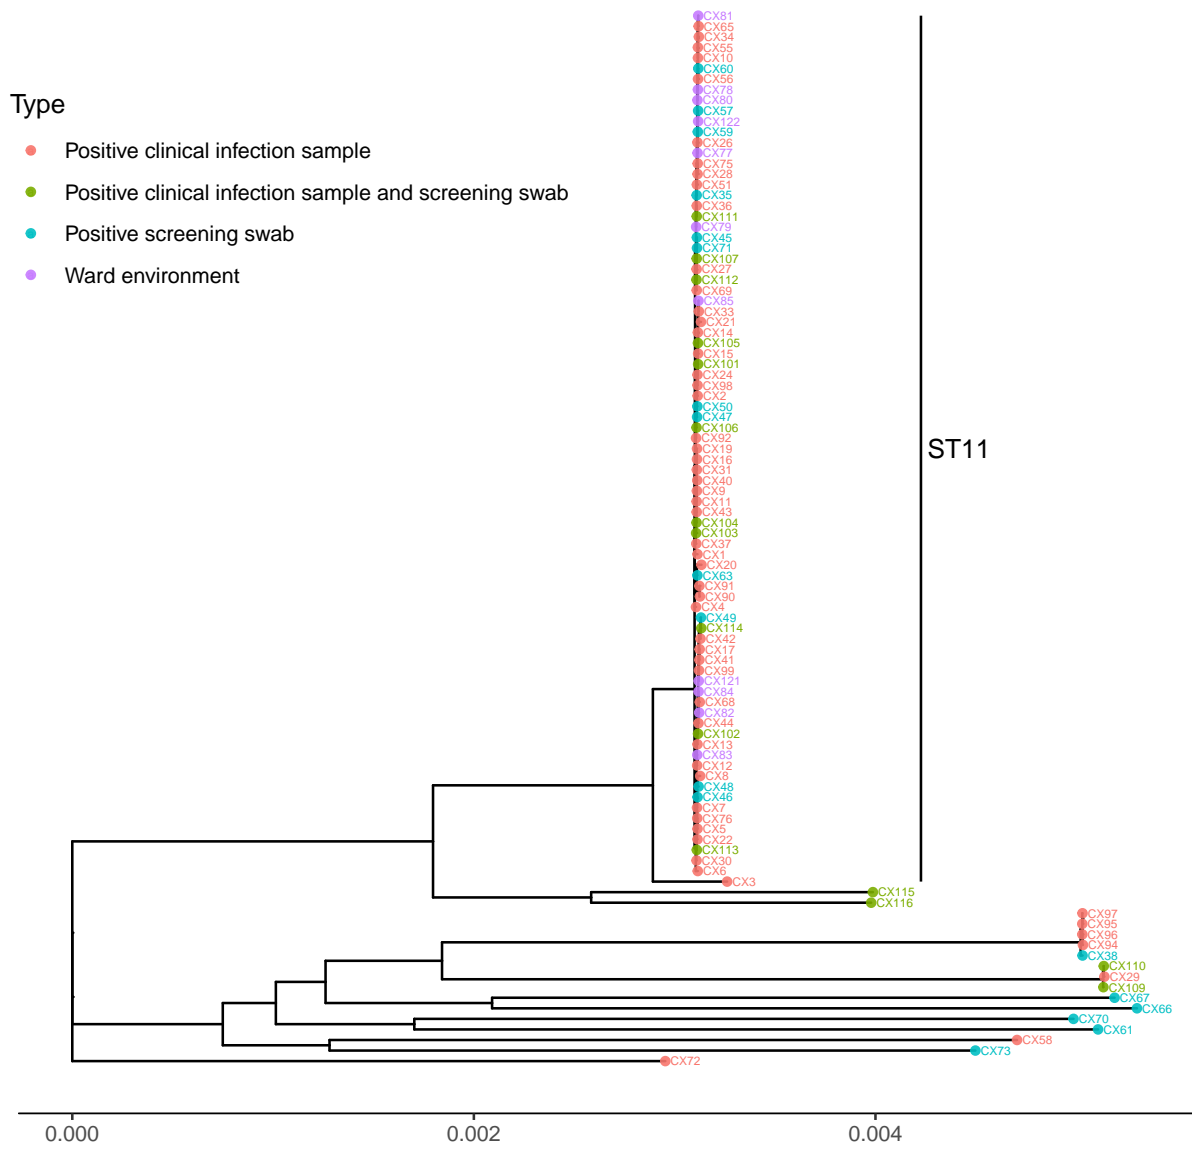

Figure S3: Core genome maximum likelihood phylogeny of 100 isolates sampled as part of the CRKP surveillance initiative. The maximum-likelihood tree is based on 4,155 shared core genes and comprises 11 different ST types. 82 closely related ST11 isolates were selected for further analyses, see Table S1. The tip colour and legend provide the type of sample from which CRKP was isolated, see Methods.

## S2 Inferring a timed phylogeny and transmission networks

### S2.1 BEAST analyses

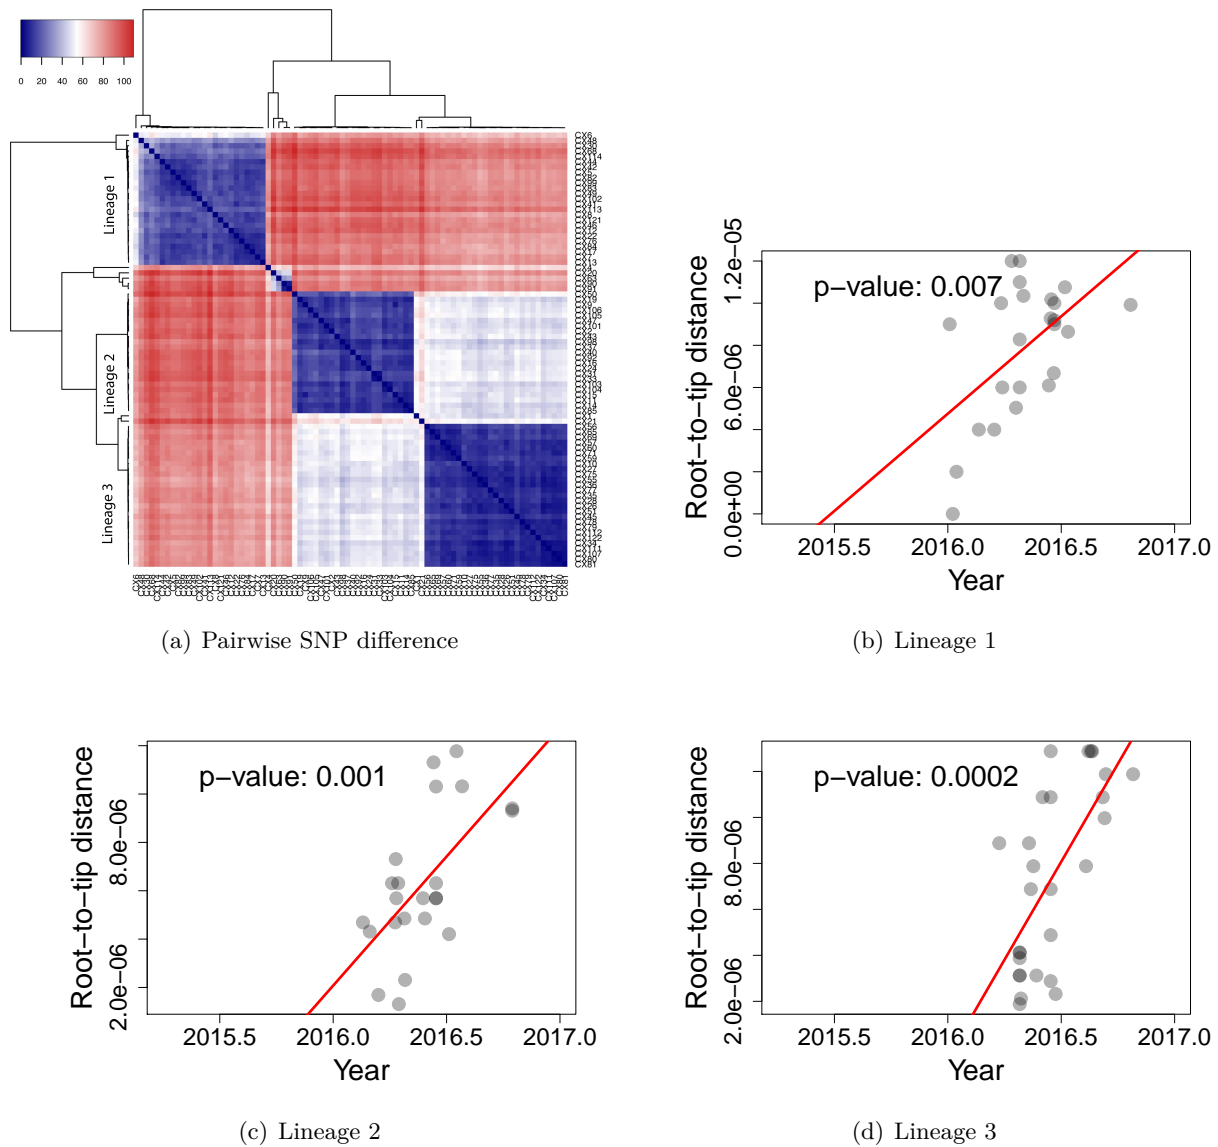

Figure S4: a) Pairwise SNP differences (number), as given by color scale in top left, between 82 ST11 outbreak isolates based on the recombination free chromosomal alignment b)-d) The correlation between the root-to-tip phylogenetic distance (y-axis) and time of sampling (x-axis) within Lineages 1-3, inferred using TempEst (Rambaut et al., 2016). All Lineages showed a significant correlation indicating measurable evolution during the sampling period. This justified the use of tip-dating phylogenetic approaches.

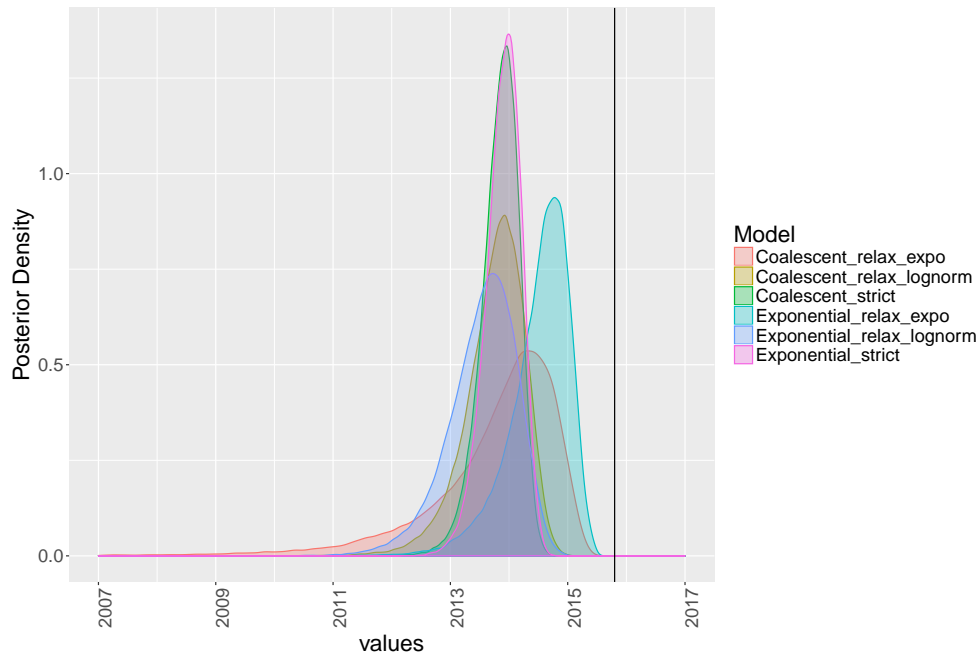

Figure S5: Inferred tMRCA under 6 alternate BEAST (?) models applied to the recombination free chromosomal alignment of 82 ST11 outbreak isolates. We applied two sets of analyses which differed in the population priors used: i) constant population size coalescent model with a strict clock (Coalescent\_strict), relaxed clock with a lognormal prior (Coalescent\_relax\_lognorm), relaxed clock with an exponential prior (Coalescent\_relax\_expo) and ii) an exponential growth population model with a strict clock (Exponential\_strict), relaxed clock with a lognormal prior (Exponential\_relax\_lognorm) and relaxed clock with an exponential prior (Exponential\_relax\_expo). Median values and 5-95% HPD intervals are provided in Supplementary Table S3. The black vertical line gives the date of admission of the index patient (Patient X) which post-dates the mean tMRCA in all cases.

Table S3: Mean tMRCA, clock rates and marginal likelihoods inferred by Bayesian dating analyses applied to the recombinant free chromosomal alignment across 82 outbreak isolates. Results are provided for both the Coalescent Bayesian Skyline and Exponential growth population models tested under strict and relaxed clocks with a TN93 substitution model. The 95% Higher Posterior Densities are provided in parentheses. The marginal likelihood (ML) estimate under each model is provided based on path-sampling implemented in Beauti Path Sampler.

| Population Model            |                                                                      |                       |                       |                                                                      |                       |                       |
|-----------------------------|----------------------------------------------------------------------|-----------------------|-----------------------|----------------------------------------------------------------------|-----------------------|-----------------------|
| Coalescent Bayesian Skyline |                                                                      |                       |                       | Exponential Population Growth                                        |                       |                       |
| Clock                       | Strict                                                               | Relaxed Lognormal     | Relaxed Exponential   | Strict                                                               | Relaxed Lognormal     | Relaxed Exponential   |
| tMRCA                       | 2013.9(2013.1-2014.4)                                                | 2013.8(2012.6-2014.6) | 2014.0(2010.6-2015.1) | 2013.9(2013.2-2014.4)                                                | 2013.6(2012.2-2014.5) | 2014.6(2013.2-2015.3) |
| Rate                        | $3.4 \times 10^{-6}$ ( $2.6 \times 10^{-6}$ - $4.1 \times 10^{-6}$ ) | /                     | /                     | $3.4 \times 10^{-6}$ ( $2.7 \times 10^{-6}$ - $4.2 \times 10^{-6}$ ) | /                     | /                     |
| ML                          | -7546540.903                                                         | -7546823.56           | -7546518.61           | -7546512.57                                                          | -7546572.86           | -7546513.66           |

## S2.2 TransPhylo analyses

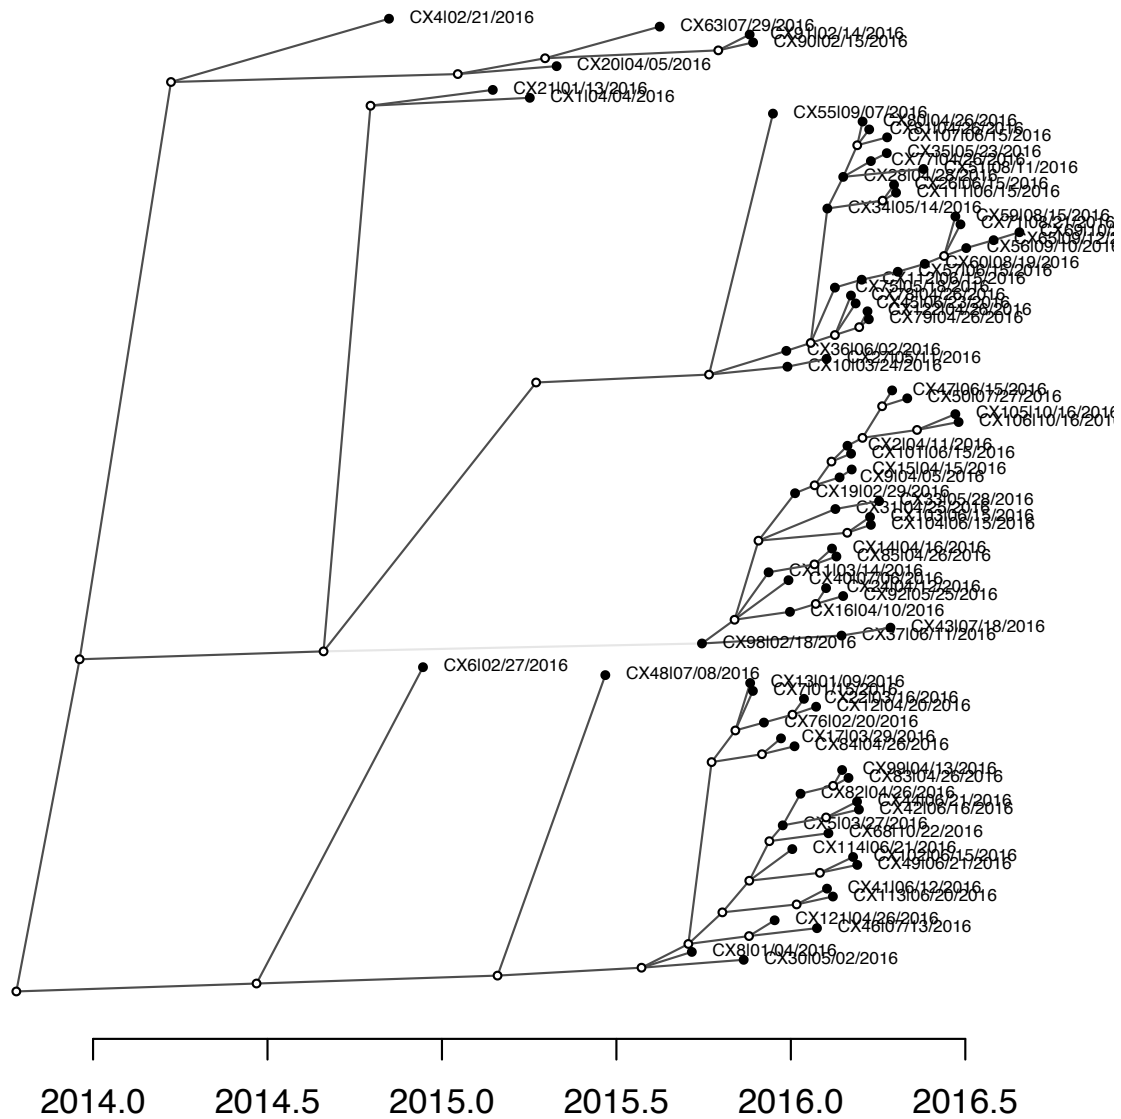

Figure S6: TransPhylo(Didelot et al., 2017) consensus transmission tree inferred across 82 ST11 isolates. The x-axis provides the mean time of infection. Filled dots represent sampled isolates and unfilled dots represent un-sampled isolates inferred to have been involved in the transmission event(s).

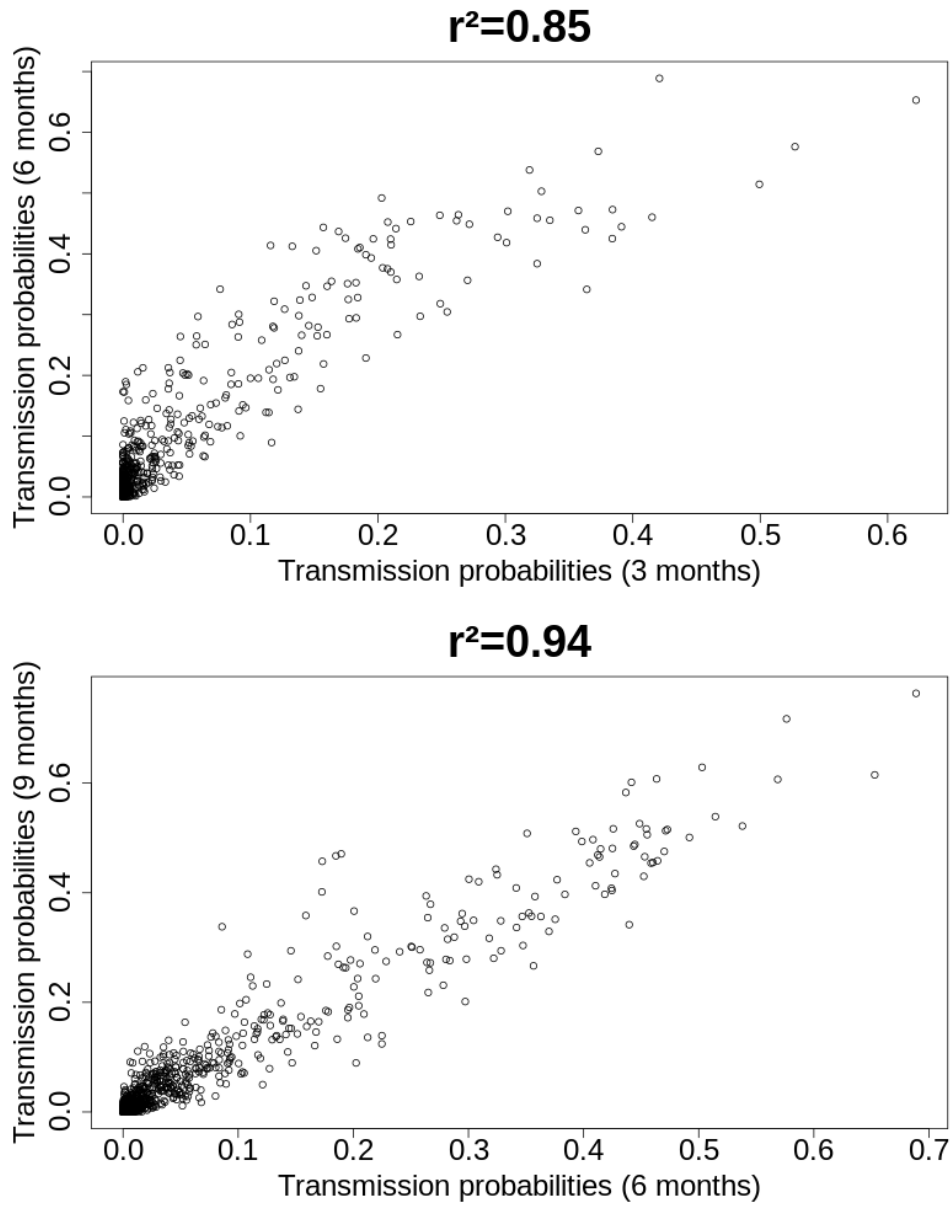

Figure S7: Pairwise correlations between the inferred probabilities of direct transmission from  $x$  to  $y$  under three independent TransPhylo runs. Each run differed in the choice of scale parameter used in the analysis, as given on the axis (scale=0.25, 3 months; scale=0.5, 6 months; scale=0.75, 9 months). The scale parameter sets the model distribution of the time taken between a transmission from a primary to secondary case. The strong correlations between runs indicates that our inferred transmission probabilities are not sensitive to different specifications.

Table S4: TransPhylo inferred probabilities of direct transmission for pairings of isolates with a probability  $\geq 0.5$ . Transphylo was run on the 82 ST11 isolates. An asterisk (\*) next to the transmission probability denotes those inferred transmissions where both patients directly overlapped on a ward during their admission. Two asterisks (\*\*) next to the transmission probability denotes those patients who were admitted to the same ward within a 14 day period of each other. Isolates in the transmission pair shown in bold are from patient-associated environmental samples (see Table S1).

| Transmission Pair       |                        | Patient of Isolation |      | Ward of Isolation |         | Campus of Isolation |         | Probability |
|-------------------------|------------------------|----------------------|------|-------------------|---------|---------------------|---------|-------------|
| Pair1                   | Pair2                  | Pat1                 | Pat2 | Ward1             | Ward2   | Campus1             | Campus2 |             |
| CX103—06/15/2016        | CX104—06/15/2016       | 29                   | 29   | H4A               | H4A     | B                   | B       | 0.93        |
| CX105—10/16/2016        | CX106—10/16/2016       | 29                   | 29   | H4A               | H4A     | B                   | B       | 0.78        |
| CX12—04/20/2016         | CX22—03/16/2016        | 23                   | 21   | ICU(4B)           | 2B      | A                   | A       | 0.81**      |
| CX16—04/10/2016         | CX24—04/12/2016        | 31                   | 32   | ICU(6B)           | 7B      | A                   | A       | 0.50*       |
| CX111—06/15/2016        | CX26—06/15/2016        | 39                   | 49   | ICU(6B)           | H4A     | A                   | B       | 0.85*       |
| CX10—03/24/2016         | CX27—05/11/2016        | 34                   | 41   | ICU(6B)           | ICU(6B) | A                   | A       | 0.86*       |
| CX101—06/15/2016        | CX2—04/11/2016         | 29                   | 3    | H4A               | 18A     | B                   | A       | 0.64        |
| CX31—04/25/2016         | CX33—05/28/2016        | 38                   | 22   | ICU(6B)           | 19A     | A                   | A       | 0.95        |
| CX113—06/20/2016        | CX41—06/12/2016        | 26                   | 26   | 8C                | 8C      | A                   | A       | 0.84        |
| CX37—06/11/2016         | CX43—07/18/2016        | 4                    | 27   | ICU(6B)           | 8C      | A                   | A       | 0.84        |
| CX42—06/16/2016         | CX44—06/21/2016        | 17                   | 18   | 7A                | 7A      | A                   | A       | 0.78*       |
| <b>CX121—04/26/2016</b> | CX46—07/13/2016        | 12                   | 56   | H7A               | ICU(4B) | B                   | A       | 0.77        |
| CX102—06/15/2016        | CX49—06/21/2016        | 29                   | 59   | H4A               | 7A      | B                   | A       | 0.85        |
| CX47—06/15/2016         | CX50—07/27/2016        | 57                   | 60   | ICU(4B)           | 8C      | A                   | A       | 0.79        |
| CX28—04/28/2016         | CX51—08/11/2016        | 47                   | 28   | H7A               | ICU(4B) | B                   | A       | 0.87        |
| CX112—06/15/2016        | CX57—06/15/2016        | 39                   | 61   | ICU(6B)           | ICU(4B) | A                   | A       | 0.58        |
| CX57—06/15/2016         | CX60—08/19/2016        | 61                   | 63   | ICU(4B)           | ICU(4B) | A                   | A       | 0.70**      |
| CX56—09/10/2016         | CX65—09/12/2016        | 42                   | 43   | ICU(6B)           | ICU(6B) | A                   | A       | 0.56*       |
| CX65—09/12/2016         | CX69—10/26/2016        | 43                   | 44   | ICU(6B)           | 17A     | A                   | A       | 0.89**      |
| CX59—08/15/2016         | CX71—08/21/2016        | 62                   | 69   | ICU(4B)           | ICU(4B) | A                   | A       | 0.64*       |
| CX112—06/15/2016        | CX75—05/18/2016        | 39                   | 25   | ICU(6B)           | ICU(4B) | A                   | A       | 0.62        |
| CX35—05/23/2016         | <b>CX77—04/26/2016</b> | 53                   | 34   | ICU(6B)           | ICU(6B) | A                   | A       | 0.93*       |
| CX45—06/23/2016         | <b>CX78—04/26/2016</b> | 55                   | 34   | 7A                | ICU(6B) | A                   | A       | 0.56*       |
| <b>CX122—04/26/2016</b> | <b>CX79—04/26/2016</b> | 34                   | 34   | ICU(6B)           | ICU(6B) | A                   | A       | 0.90        |
| CX13—01/09/2016         | CX7—01/15/2016         | 11                   | 10   | ICU(4B)           | ICU(4B) | A                   | A       | 0.83**      |
| CX107—06/15/2016        | <b>CX81—04/26/2016</b> | 49                   | 34   | H4A               | ICU(6B) | B                   | A       | 0.76*       |
| <b>CX80—04/26/2016</b>  | <b>CX81—04/26/2016</b> | 34                   | 34   | ICU(6B)           | ICU(6B) | A                   | A       | 0.61        |
| CX17—03/29/2016         | <b>CX84—04/26/2016</b> | 12                   | 12   | H7A               | H7A     | B                   | B       | 0.86        |
| CX14—04/16/2016         | <b>CX85—04/26/2016</b> | 29                   | 29   | H4A               | H4A     | B                   | B       | 0.88        |
| CX30—05/02/2016         | CX8—01/04/2016         | 20                   | 13   | ICU(4B)           | 7A      | A                   | A       | 0.78        |
| CX90—02/15/2016         | CX91—02/14/2016        | X                    | X    | 7A                | 7A      | A                   | A       | 0.93        |
| CX24—04/12/2016         | CX92—05/25/2016        | 32                   | 19   | 7B                | 7A      | A                   | A       | 0.76*       |
| <b>CX83—04/26/2016</b>  | CX99—04/13/2016        | 35                   | 35   | ICU(6B)           | ICU(6B) | A                   | A       | 0.90        |
| CX15—04/15/2016         | CX9—04/05/2016         | 36                   | 16   | ICU(6B)           | ICU(4B) | A                   | A       | 0.93*       |



### S3 Inferring core and accessory genome structure

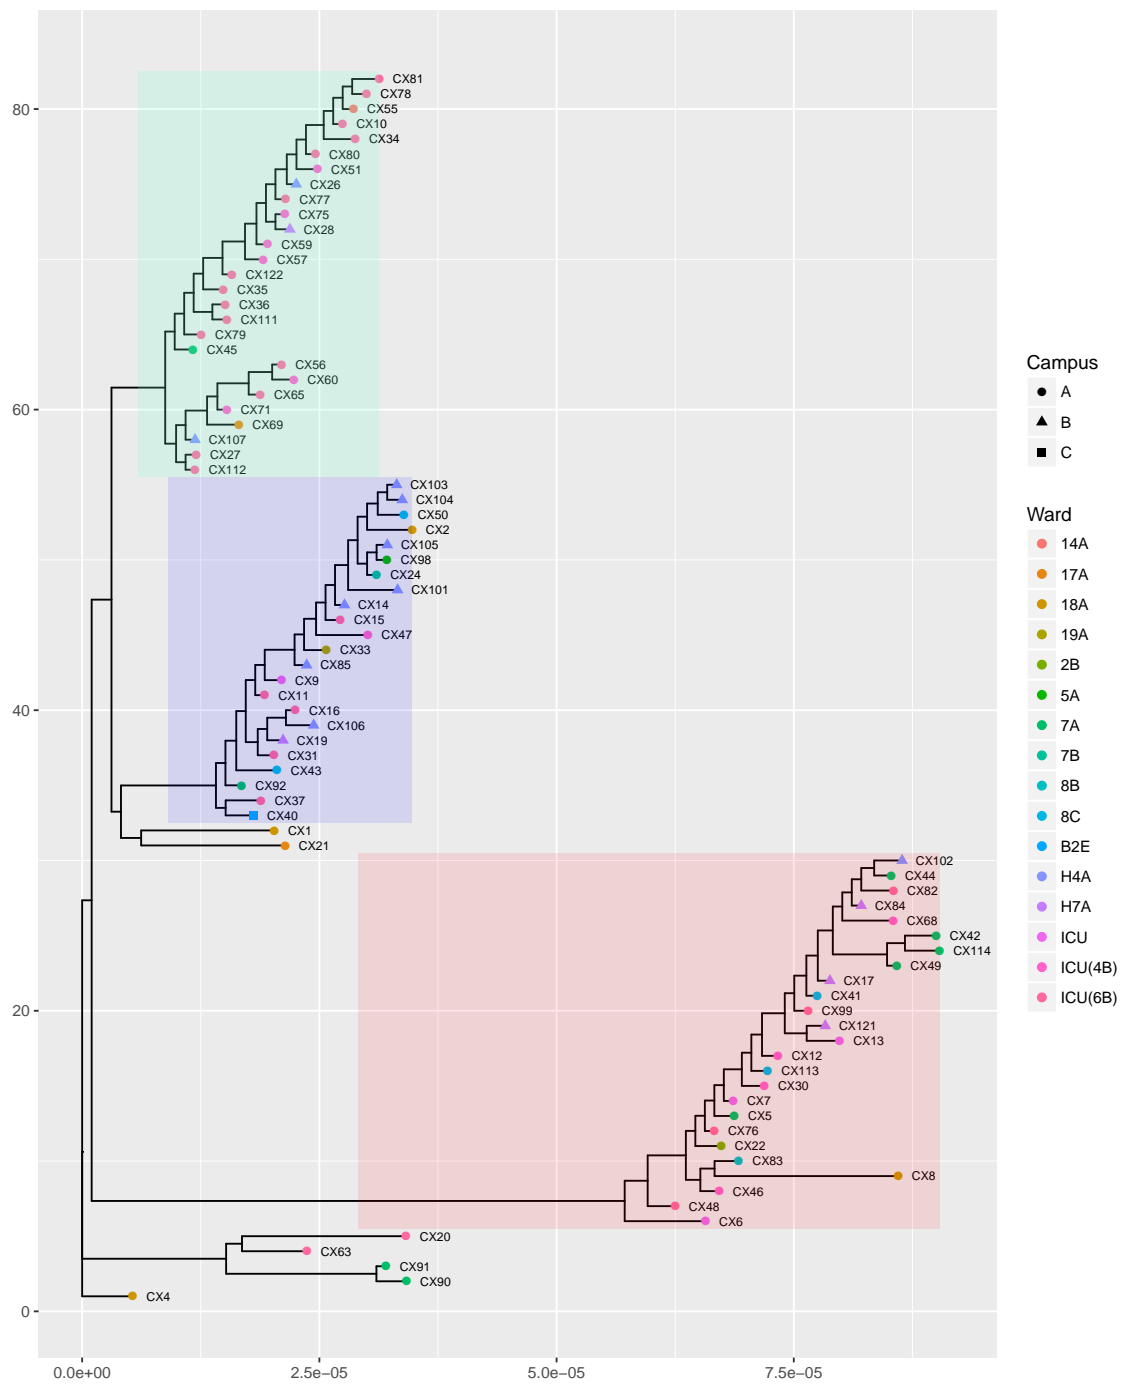

Figure S8: Core genome phylogeny of 82 ST11 outbreak isolates based on 4,652 shared core genes. Tips are colored according to the ward of isolation with symbols giving the hospital campus. The pan-genome phylogeny clusters into three main lineages as highlighted.

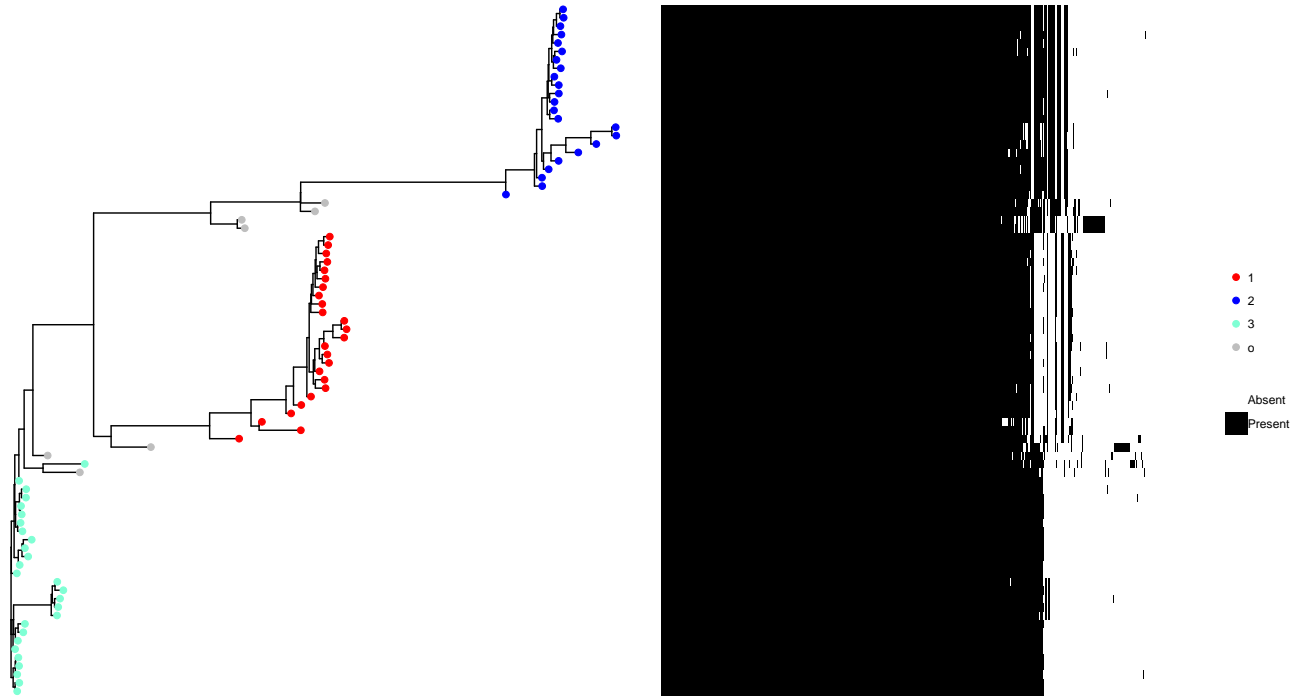

Figure S9: Left) Core and accessory distance tree based on the binary presence and absence of annotated genes. Tips are colored according to the three-lineage structure observed on the core and chromosomal alignments as given in the legend at right. Right) Presence (black) and absence (white) of annotated genes comprising the core (present in all samples) and accessory genome (non-shared) components.

Table S5: Presence of plasmid replicons as inferred by PlasmidFinder (Carattoli et al., 2014) applied to short-read *de novo* assemblies of 82 ST11 outbreak *Kpn* isolates. The frequency of each plasmid type is provided across all isolates (All) as well as within distinct phylogenetic lineages (Lineage 1-3) and among outliers (Outliers). The mean number of assignments per strain lineage is also given.

| Plasmid Type     | All (n=82) | Lineage 1 (n=25) | Lineage 2 (n=23) | Lineage 3 (n=27) | Outliers(n=7) |
|------------------|------------|------------------|------------------|------------------|---------------|
| ColI56           | 1          |                  |                  | 1                |               |
| Col(MG828)       | 1          |                  | 1                |                  |               |
| IncFIB(pKPHS1)   | 1          |                  |                  |                  | 1             |
| IncI2            | 1          |                  | 1                |                  |               |
| IncN             | 1          |                  |                  |                  | 1             |
| IncFIB(Mar)      | 2          |                  |                  |                  | 2             |
| IncX1            | 2          |                  | 2                |                  |               |
| ColpVC           | 5          | 2                | 1                | 2                |               |
| IncFIB(AP001918) | 23         | 21               |                  | 1                | 1             |
| IncFIA           | 25         | 24               |                  | 1                |               |
| IncFII           | 26         |                  | 23               | 1                | 2             |
| IncFIB(K)        | 27         |                  | 23               |                  | 4             |
| IncR             | 28         | 25               |                  |                  | 3             |
| ColRNAI          | 82         | 24               | 23               | 27               | 7             |
| IncFII(pHN7A8)   | 82         | 25               | 23               | 27               | 7             |
| TOTAL            | 307        | 121              | 97               | 60               | 28            |
| Mean/isolate     | 3.74       | 4.84             | 4.22             | 2.22             | 4             |

## S4 AMR gene copy number variation (CNV) and phenotypic resistance

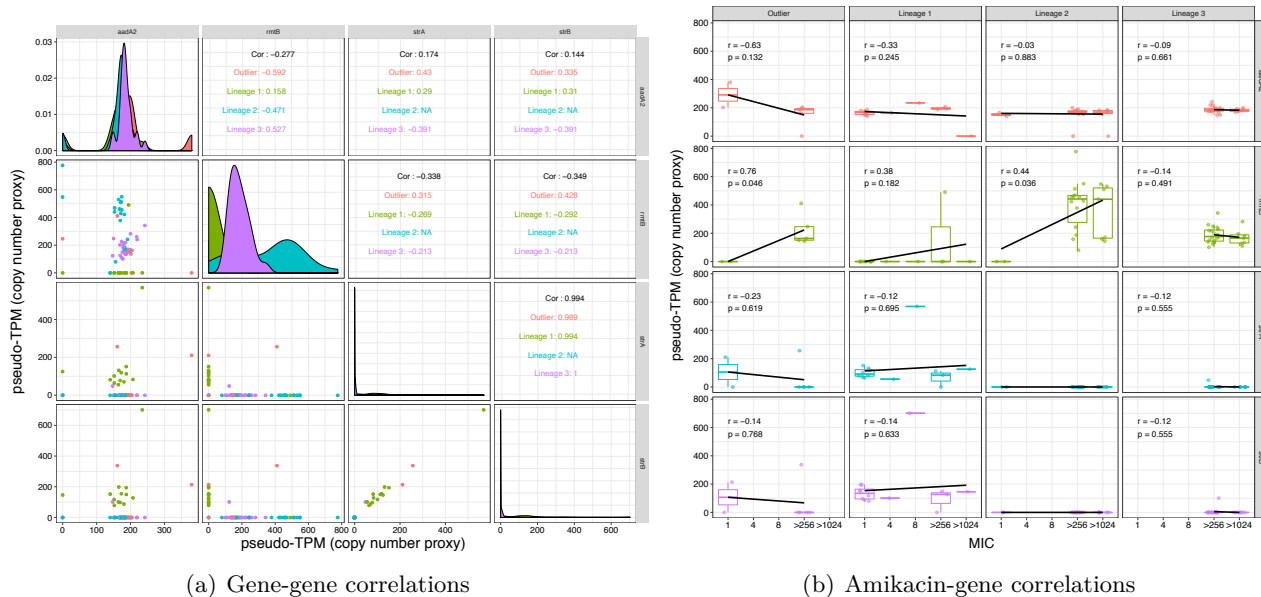

(a) Gene-gene correlations

(b) Amikacin-gene correlations

Figure S10: a) Between-gene correlations for pseudo-TPMs of four genes associated with resistance to aminoglycosides, stratified by lineage (Lineage 1:green, Lineage 2:blue, Lineage 3:purple, outliers:orange). *strA* and *strB* were highly correlated (across lineages: Spearman's  $\rho = 0.998$ ,  $p < 0.001$ ; within Lineage 1, Spearman's  $\rho = 0.903$ ,  $p < 0.001$ ), in line with their co-occurrence which has previously been observed across integrons, transposons, and broad-host-range plasmids across the Enterobacteriaceae (Sundin, 2002; Dolejska et al., 2013; Compain et al., 2014). The *strA-strB* genes were anti-correlated with the 16S rRNA methyltransferase *rmtB* (across lineages for *strA*: Spearman's  $\rho = -0.602$ ,  $p < 0.001$ ), which provides a higher-level of aminoglycoside resistance (Doi et al., 2004). b) Correlations between resistance gene pseudo-TPMs and measured MICs against amikacin, stratified by lineage (Lineage 1:green, Lineage 2:blue, Lineage 3:purple, outliers:orange). Trend lines and Pearson correlations are shown. Lineage 1 isolates lacked *rmtB*, and these isolates correspondingly were less resistant to amikacin. Using the EUCAST (<https://mic.eucast.org>) epidemiological cutoff (MIC > 8.0  $\mu\text{g}/\text{ml}$ ), 4/14 isolates in Lineage 1 were resistant, compared to 21/23 (Lineage 2) and 27/27 (Lineage 3). Furthermore, the two isolates within Lineage 2 that were not resistant lacked *rmtB*. However, there was no difference in the pseudo-TPMs for *rmtB* comparing isolates with MIC > 256  $\mu\text{g}/\text{ml}$  to those with MIC > 1024  $\mu\text{g}/\text{ml}$  (Wilcoxon signed-rank test,  $p = 0.42$ ), suggesting that the presence of *rmtB* was important but not its relative copy number i.e. that other factors dictate the different MIC values. Many isolates in Lineage 2 had approximately double the pseudo-TPM for *rmtB* of those in Lineage 3, but an additional copy was not observed in the assemblies. This would be consistent with an additional copy of the gene due to a duplicated plasmid, although this did not result in greater resistance.

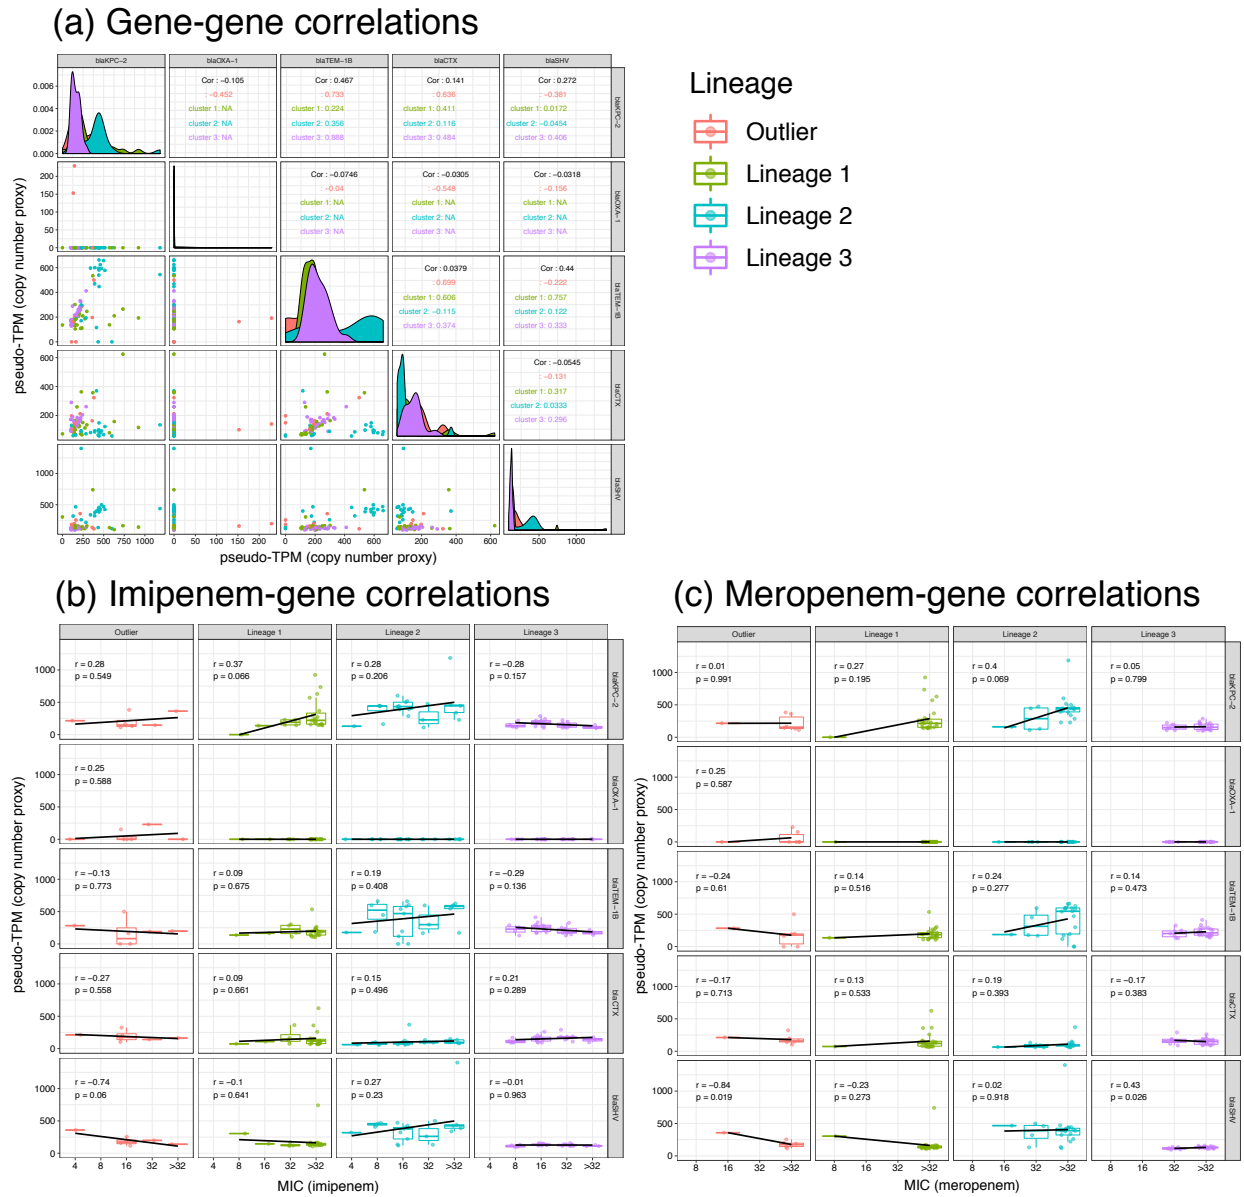

Figure S11: a) Between-gene correlations for pseudo-TPMs of two genes associated with resistance to beta-lactams, stratified by lineage (colors). Resistance to beta-lactam antibiotics (including imipenem and meropenem) can be conferred by a range of beta-lactamases. These contribute to resistance in a cumulative manner, contrasting with the anti-correlation as observed for aminoglycoside resistance genes with different mechanisms (Supplementary Figure S10). b)-c) Correlations between resistance gene pseudo-TPMs and measured MICs of (b) imipenem and (c) meropenem, stratified by lineage (colors). Trend lines and Pearson correlations are shown. *blaKPC-2* was associated with increased MICs to imipenem and meropenem in Lineage 1 and Lineage 2 but not Lineage 3. Not shown are beta-lactamase genes that do not hydrolyze carbapenems, which were present in the dataset (e.g. *blaOXA-1*, *blaSHV*, *blaTEM-1*) but for which we observed no significant correlations with imipenem or meropenem MICs, as expected.

### (a) Gene-gene correlations

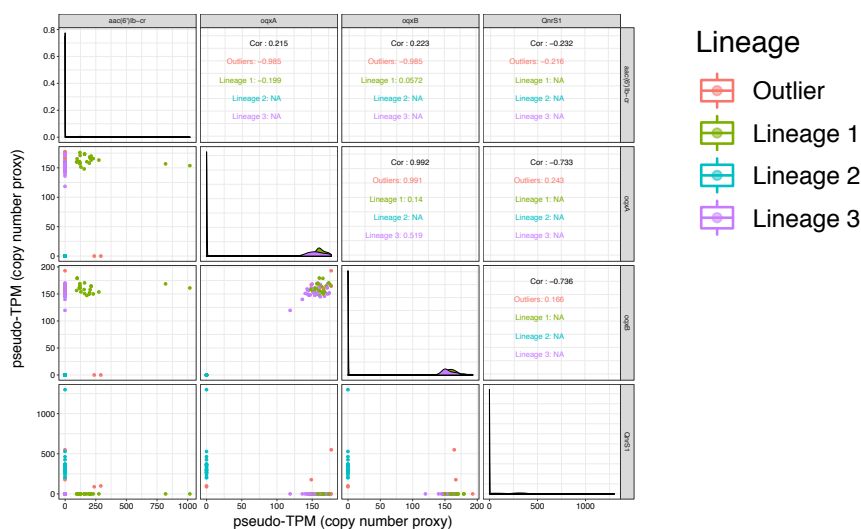

### (b) Ciprofloxacin-gene correlations

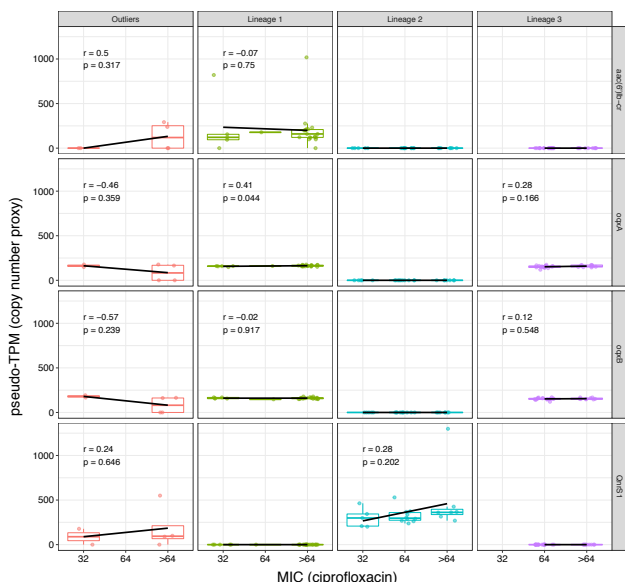

### (c) Levofloxacin-gene correlations

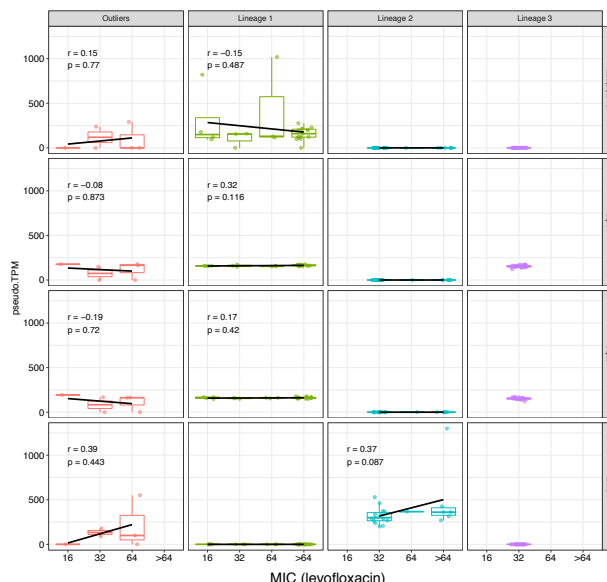

Figure S12: a) Between-gene correlations for pseudo-TPMs of four genes associated with resistance to quinolones, stratified by lineage (colors). Quinolone resistance is additionally linked to the quinolone resistance-determining regions (QRDR) in the *gyrA* and *parC* genes (Jacoby, 2005). Comparing sequences to the genes in *K. pneumoniae* ATCC 13883 reference strain, all isolates had common mutations at the 83rd and 87th resistance ‘hotspots’ of *gyrA* (S83I and D87G). In *parC* one of the mutation hotspots was mutated (S80I). All isolates correspondingly were resistant according to EUCAST epidemiological cutoffs (ciprofloxacin MIC > 0.125  $\mu\text{g}/\text{ml}$ ; levofloxacin MIC > 0.25  $\mu\text{g}/\text{ml}$ ). The presence of multiple fluoroquinolone resistance determinants has been reported to be cumulative, including both point mutations and additional genes (Ruiz et al., 2012; Al-Marzooq et al., 2014). The efflux system of two genes *oqxAB* was present in Lineages 1 and 3 but not in Lineage 2, which had *QnrS1* present instead. b)-c) Correlations between resistance gene pseudo-TPMs and measured MICs of (b) ciprofloxacin and (c) levofloxacin. Trend lines and Pearson correlations are shown. The pseudo-TPM (copy number) of *QnrS1* was associated with increased MICs for levofloxacin and ciprofloxacin in Lineage 2 and in the outlying isolates.

## S5 Plasmid assemblies

Table S6: PacBio assemblies providing the isolate ID and lineage assignment (outlier O, 1, 2, 3) together with assembly sizes (in base pairs). The method applied to generate each assembly is provided. All use UniCycler (Wick et al., 2017) (abbreviation UC) but differ in whether short-read data is used to inform the assembly (hybrid), or only long-read data is used (PacBio\_only) in normal (default) or bold (bold) mode. In some instances raw PacBio reads were filtered for quality using FiltLong. For CX45, additional polishing was performed following assembly with Racon (Vaser et al., 2017). Most plasmids were reported as circularised by UniCycler. \* denotes those plasmids which were manually circularised, based on the presence of exactly overlapping sequence ends in the assembly. ‘+’ denotes where the plasmid has been assembled using additional information from the short-read only *de novo* assembly. The chromosomes of CX45 and CX77 were not circularised and in both cases assembled as two linear contigs.

| ID    | Lineage | Method                         | Chromosome      | Virulence | <i>bla</i> <sub>KPC-</sub> | <i>bla</i> <sub>KPC+</sub> | ≈10Kb Plasmid |
|-------|---------|--------------------------------|-----------------|-----------|----------------------------|----------------------------|---------------|
| CX90  | O       | UC_raw_hybrid                  | 5,412,826       | 284,901   | 123,558                    | 116,106                    | 10,060        |
| CX20  |         | UC_raw_hybrid                  | 5,477,860       | /         | 243,743                    | 128,569                    | 10,060        |
| CX41  | 1       | UC_Filtlong_PacBio_only        | 5,543,726       | /         | 126,359                    | 53,491                     | 10,263        |
| CX16  | 2       | UC_raw_hybrid                  | 5,447,232       | /         | 101,140                    | 295,742*                   | 10,063        |
| CX104 |         | UC_Filtlong_PacBio_only        | 5,575,620       | /         | 201,030                    | 124,464*                   | 10,062+       |
| CX105 |         | UC_PacBio_only                 | 5,575,842       | /         | 36,801*                    | 348,763*                   | 10,060+       |
| CX45  | 3       | UC_PacBio_only_bold_plus_racon | 4346009,1238371 | /         | /                          | 135,777*                   | 11,972+       |
| CX77  |         | UC_raw_hybrid                  | 3405931,2070976 | /         | /                          | 135,788                    | 11,970        |

Table S7: Plasmid type assignments of plasmids assembled using PacBio long-read sequencing technology. Plasmid types were assigned using PlasmidFinder (Carattoli et al., 2014) based on the presence of specific replicon sequences with >95% percentage identity to the reference, as also shown in main text Figure 3. All isolates carried a colRNAI plasmid.

| Isolate | Lineage | Virulence   | <i>bla</i> <sub>KPC-</sub> | <i>bla</i> <sub>KPC+</sub> | ≈10Kb Plasmid |
|---------|---------|-------------|----------------------------|----------------------------|---------------|
| CX90    | O       | IncFIB(Mar) | IncFIB(K)                  | IncFII                     | colRNAI       |
| CX20    |         | /           | IncFIB(K),IncFII           | IncFII, IncR               | colRNAI       |
| CX41    | 1       | /           | IncFIB, IncFII             | IncFIA                     | colRNAI       |
| CX16    | 2       | /           | IncFII                     | IncFIB(K)                  | colRNAI       |
| CX104   |         | /           | IncFIB(K)                  | IncFII                     | colRNAI       |
| CX105   |         | /           | IncR                       | IncFIB(K),IncFII           | colRNAI       |
| CX45    | 3       | /           | /                          | IncFII                     | colRNAI       |
| CX77    |         | /           | /                          | IncFII                     | colRNAI       |

## S5.1 Plasmid copy number variation

Table S8: For each plasmid assembled using PacBio long read sequencing technology (Table S6), we provide the average coverage of that same isolate’s short-read data mapped back to the plasmid (point estimate). This provides a proxy for plasmid copy number. We also provide the 95% CI in parentheses of the mean coverage across each of our 82 ST11 short-read samples mapped back to that same plasmid. A ‘/’ indicates the absence of this plasmid in the sequenced isolate assembly. We observed considerable variability in coverage across the outbreak cohort, with instances of clear plasmid loss and gains, as also highlighted in main text Figures 3 and 4.

| Isolate | Lineage | Virulence | <i>bla</i> <sub>KPC-</sub> | <i>bla</i> <sub>KPC+</sub> | ≈10Kb Plasmid     |
|---------|---------|-----------|----------------------------|----------------------------|-------------------|
| CX90    | O       | 1.32(0-0) | 0.48(0-1.07)               | 0.89(0.44-2.64)            | 1.54(0.95-6.66)   |
| CX20    |         | /         | 0.68(0-0.86)               | 0.62(0.44-2.02)            | 0.94(0.94-6.19)   |
| CX41    | 1       | /         | 0.99(0.44-1.72)            | 0.92(0.46-2.69)            | 2.1(1.04-6.92)    |
| CX16    | 2       | /         | 0.48(0-1.07)               | 3.14(0.34-3.14)            | 2.09(0.95-6.49)   |
| CX104   |         | /         | 0.66(0-1.08)               | 3.65(0.48-4.58)            | 8.96(1.63-9.99)   |
| CX105   |         | /         | 1.35(0-7.72)               | 1.55(0.35-2.11)            | 11.97(1.97-11.97) |
| CX45    | 3       | /         | /                          | 0.99(0.72-3.15)            | 2.97(1.45-6.18)   |
| CX77    |         | /         | /                          | 1.42(0.74-3.29)            | 3.1(1.49-6.34)    |

Table S9: For each plasmid assembled using PacBio long read sequencing technology (Table S6), we provide the percentage (%) of the plasmid covered by that same isolate’s short-read data mapped back to the plasmid (point estimate). We also provide the 95% CI in parentheses of the mean percentage of the plasmid covered across each of our 82 ST11 short-read samples mapped back to that same plasmid. A ‘/’ indicates the absence of this plasmid in the sequenced isolate assembly. As with coverage (see main text Figure 3 and 4), we observed considerable variability in the percentage of the genome covered for different plasmids.

| Isolate | Lineage | Virulence      | <i>bla</i> <sub>KPC-</sub> | <i>bla</i> <sub>KPC+</sub> | ≈10Kb Plasmid    |
|---------|---------|----------------|----------------------------|----------------------------|------------------|
| CX90    | O       | 100 (5.5-10.5) | 100 (10.9-99.8)            | 100 (52.1-98.9)            | 100 (100-100)    |
| CX20    |         | /              | 100(10.5-80.7)             | 100 (66.1-86.2)            | 100 (100-100)    |
| CX41    | 1       | /              | 89.8 (40.3-92.3)           | 91.7 (52.4-86.9)           | 96.8 (96.4-98.2) |
| CX16    | 2       | /              | 100 (34.5-100)             | 100 (37.9-100)             | 100 (100-100)    |
| CX104   |         | /              | 94.2 (4.2-92.3)            | 92.2 (59.4-91.3)           | 100 (100-100)    |
| CX105   |         | /              | 92.3 (2.9-70.5)            | 87.6 (28.0-87.0)           | 100 (100-100)    |
| CX45    | 3       | /              | /                          | 89.8 (70.3-100)            | 100 (100-100)    |
| CX77    |         | /              | /                          | 100 (85.6-100)             | 100 (100-100)    |

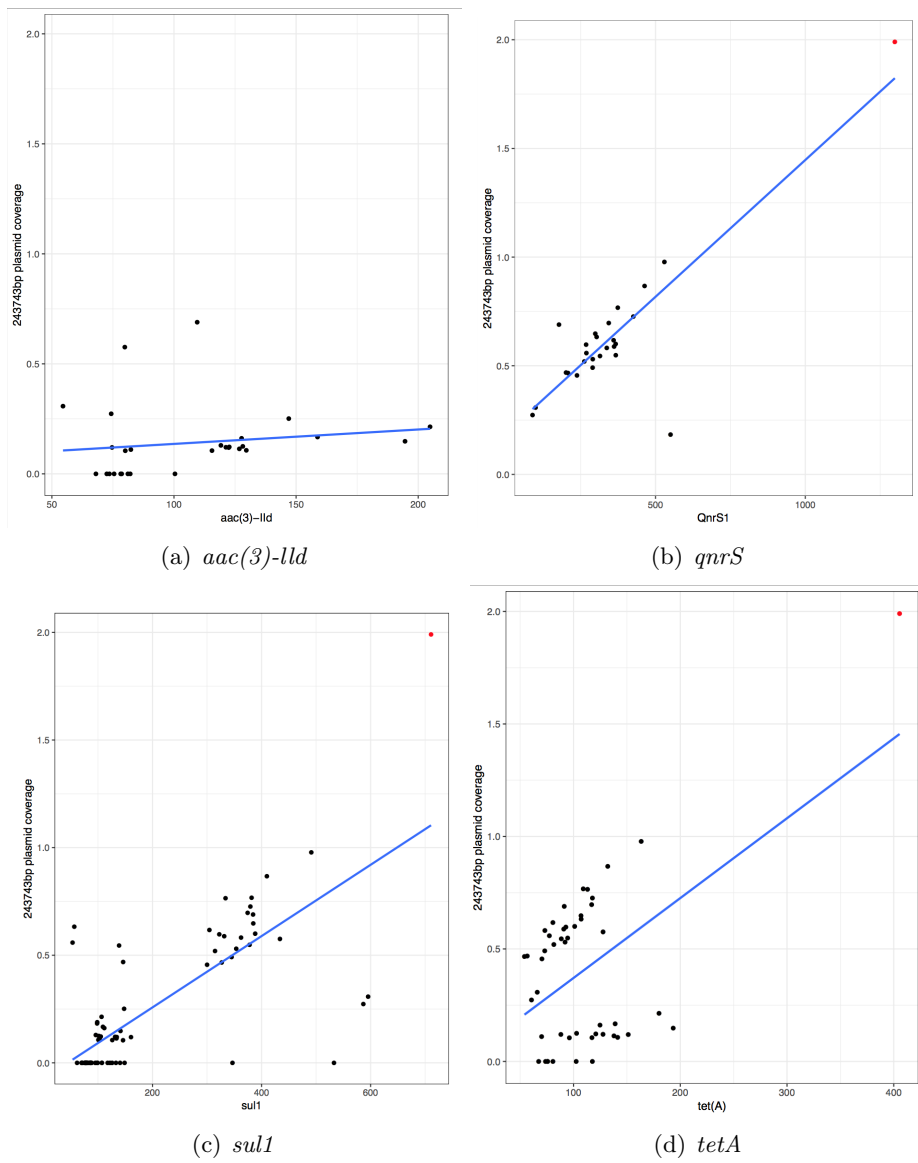

Figure S13: Relationship between pseudo TPMs (see Methods) estimated for *aac(3)-lld*, *qnrS*, *sul1*, *tetA* (x-axis) to the coverage of short-read sequence data mapped against the 243,743bp complete plasmid assembled from CX20 (y-axis).



## S5.2 Accessory genome mobility

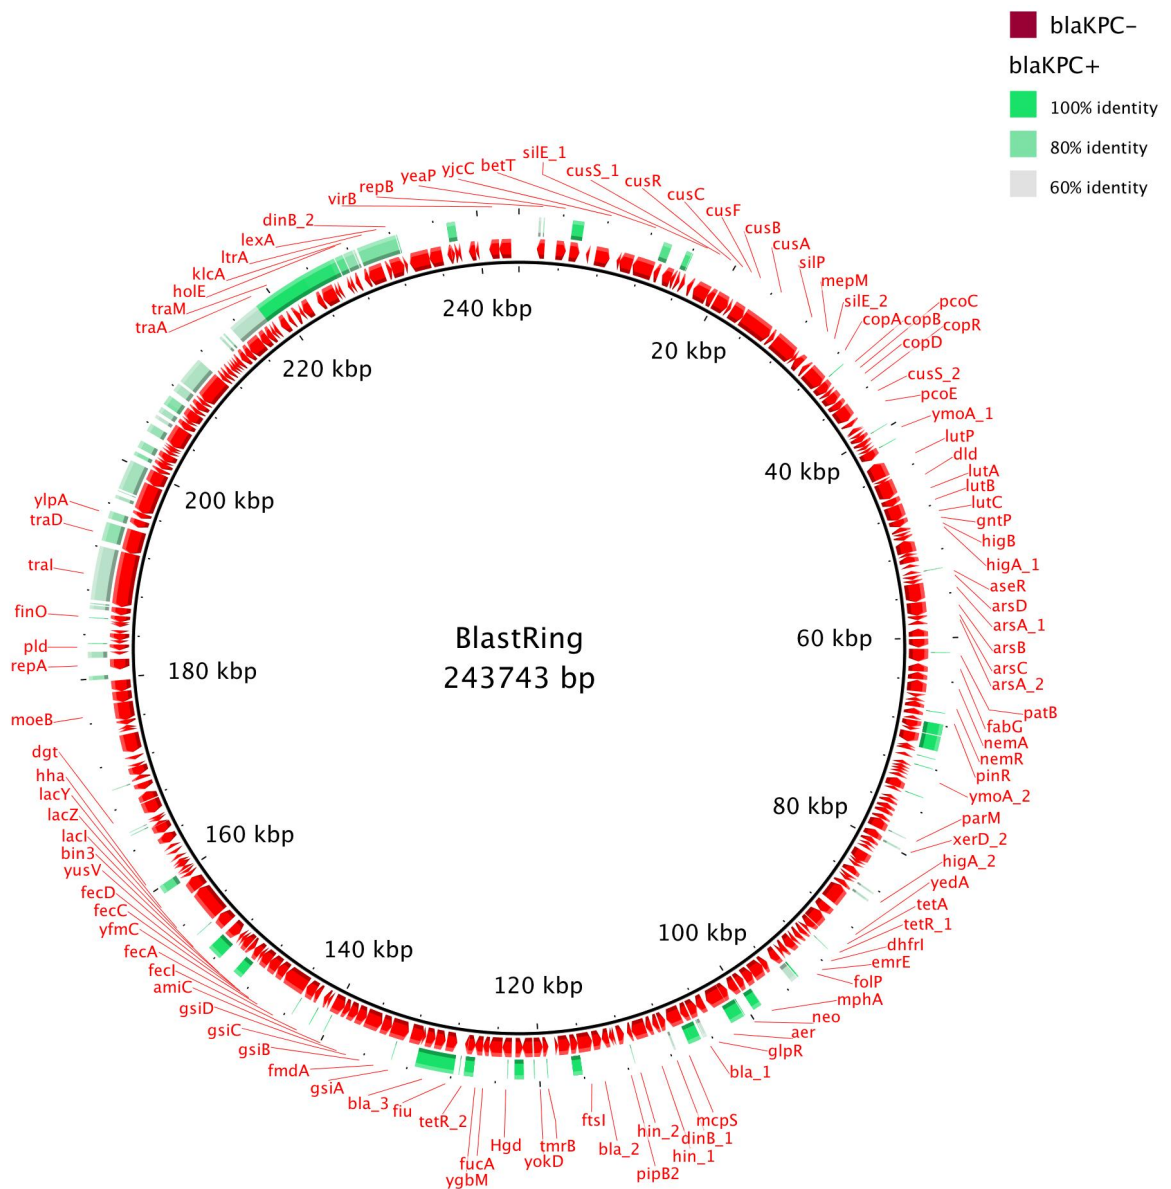

Figure S14: Blast ring (Alikhan et al., 2011) of % identity between two plasmids assembled using long-read data from CX20. The *bla*<sub>KPC+</sub> plasmid (outer ring; green), shares a portion of its genome with the other large *bla*<sub>KPC-</sub> plasmid assembled in this strain (inner ring; red). This region contains transfer genes *traI*, *traD*, *traA*, *traM* and may represent a region of putative recombination between plasmids in circulation in the same strain.

### S5.3 *bla*<sub>KPC</sub> mobility

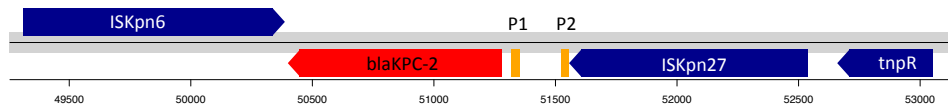

(a)

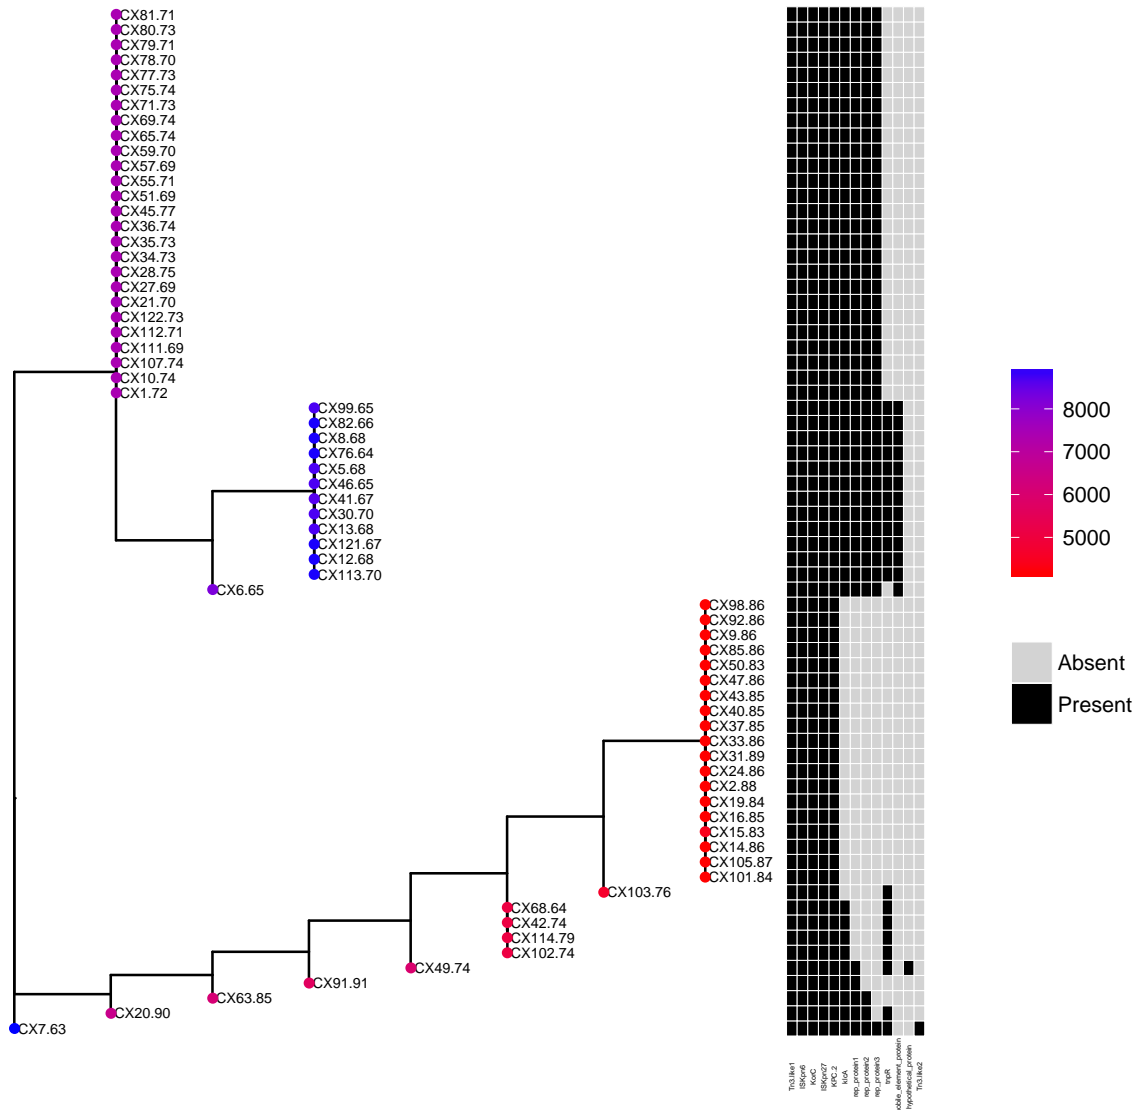

(b)

Figure S15: a) Genomic structure of the *bla*<sub>KPC+</sub> TN1722 type transposon which was highly conserved across our 82 ST11 isolates. b) Gene presence absence binary phylogeny of genes annotated on *bla*<sub>KPC+</sub> contigs. The annotation was compared across 68 ST11 isolates for which there was a region at least >1200bp long either side of *bla*<sub>KPC</sub>. The color scale gives the contig lengths.

## References

- Al-Marzooq, F., Mohd Yusof, M.Y. and Tay, S.T. Molecular analysis of ciprofloxacin resistance mechanisms in Malaysian ESBL-producing *Klebsiella pneumoniae* isolates and development of mismatch amplification mutation assays (MAMA) for rapid detection of *gyrA* and *parC* mutations. *BioMed research international*, 2014:601630, 2014. ISSN 2314-6141. doi: 10.1155/2014/601630.
- Alikhan, N.F., Petty, N.K., Ben Zakour, N.L. and Beatson, S.A. BLAST Ring Image Generator (BRIG): simple prokaryote genome comparisons. *BMC Genomics*, 12(1):402, dec 2011. ISSN 1471-2164. doi: 10.1186/1471-2164-12-402.
- Carattoli, A., Zankari, E., García-Fernández, A., Voldby Larsen, M., Lund, O., Villa, L., Møller Aarestrup, F. and Hasman, H. *In Silico* Detection and Typing of Plasmids using PlasmidFinder and Plasmid Multilocus Sequence Typing. *Antimicrobial Agents and Chemotherapy*, 58(7):3895–3903, jul 2014. ISSN 0066-4804. doi: 10.1128/AAC.02412-14.
- Compain, F., Frangeul, L., Drieux, L., Verdet, C., Brisse, S., Arlet, G. and Decré, D. Complete nucleotide sequence of two multidrug-resistant IncR plasmids from *Klebsiella pneumoniae*. *Antimicrobial agents and chemotherapy*, 58(7):4207–10, jul 2014. ISSN 1098-6596. doi: 10.1128/AAC.02773-13.
- Didelot, X., Fraser, C., Gardy, J. and Colijn, C. Genomic infectious disease epidemiology in partially sampled and ongoing outbreaks. *Molecular Biology and Evolution*, 34(4):msw075, jan 2017. ISSN 0737-4038. doi: 10.1093/molbev/msw275.
- Doi, Y., Yokoyama, K., Yamane, K., Wachino, J.I., Shibata, N., Yagi, T., Shibayama, K., Kato, H. and Arakawa, Y. Plasmid-mediated 16S rRNA methylase in *Serratia marcescens* conferring high-level resistance to aminoglycosides. *Antimicrobial agents and chemotherapy*, 48(2):491–6, feb 2004. ISSN 0066-4804.
- Dolejska, M., Villa, L., Dobiasova, H., Fortini, D., Feudi, C. and Carattoli, A. Plasmid Content of a Clinically Relevant *Klebsiella pneumoniae* Clone from the Czech Republic Producing CTX-M-15 and QnrB1. *Antimicrobial Agents and Chemotherapy*, 57(2):1073–1076, feb 2013. ISSN 0066-4804. doi: 10.1128/AAC.01886-12.
- Jacoby, G.A. Mechanisms of Resistance to Quinolones. *Clinical Infectious Diseases*, 41(Supplement\_2): S120–S126, jul 2005. ISSN 1537-6591. doi: 10.1086/428052.
- Rambaut, A., Lam, T.T., Max Carvalho, L. and Pybus, O.G. Exploring the temporal structure of heterochronous sequences using TempEst (formerly Path-O-Gen). *Virus evolution*, 2(1):vew007, jan 2016. ISSN 2057-1577. doi: 10.1093/ve/vew007.
- Ruiz, J., Pons, M.J. and Gomes, C. Transferable mechanisms of quinolone resistance. *International Journal of Antimicrobial Agents*, 40(3):196–203, sep 2012. ISSN 09248579. doi: 10.1016/j.ijantimicag.2012.02.011.
- Sundin, G.W. Distinct Recent Lineages of the *strA* - *strB* Streptomycin-Resistance Genes in Clinical and Environmental Bacteria. *Current Microbiology*, 45(1):63–69, jul 2002. ISSN 0343-8651. doi: 10.1007/s00284-001-0100-y.
- Vaser, R., Sović, I., Nagarajan, N. and Šikić, M. Fast and accurate de novo genome assembly from long uncorrected reads. *Genome research*, 27(5):737–746, jan 2017. ISSN 1549-5469. doi: 10.1101/gr.214270.116.
- Wick, R.R., Judd, L.M., Gorrie, C.L. and Holt, K.E. Unicycler: Resolving bacterial genome assemblies from short and long sequencing reads. *PLOS Computational Biology*, 13(6):e1005595, jun 2017. ISSN 1553-7358. doi: 10.1371/journal.pcbi.1005595.
